# Supplementary material for: scTWAS: A powerful statistical framework for single-cell transcriptome-wide association studies
Source: Research Square preprint supplement (doi:10.21203/rs.3.rs-6531106/v1), 2025-09-30
Supplement: Supplementary file 1 [file 9dbd1c2242e39f41dba3c1aa.xlsx]

## Sheet: Description
Table S2: A summary of number of individuals, number of cells and number of genes analyzed for each cell (sub)type in OneK1K and ROSMAP datasets.
Table S3: A full list of genes associated with RA identified by scTWAS.
Table S4: A full list of genes associated with SLE identified by scTWAS.
Table S5: A full list of genes associated with Asthma identified by scTWAS.
Table S4: A full list of genes associated with AD identified by scTWAS.

## Sheet: Table S2
OneK1K dataset
celltype	ncells	nsubj	ngenes>1000count	cellperind
B_IN	82068	982	7879	84
B_MEM	48023	982	7174	49
CD4_NC	463528	982	11448	472
CD4_ET	61786	982	7652	63
CD8_NC	133482	982	9466	136
CD8_ET	205077	982	9949	209
CD8_S100B	34528	981	6001	35
DC	8690	968	4658	9
Mono_C	38233	969	6942	39
Mono_NC	15166	934	4992	16
NK_R	9677	969	2620	10
NK	159820	982	9717	163
Plasma	3625	795	3346	5
ROSMAP dataset
major_cell_type	ncells	nsubj	ngenes>1000count	cellperind
Excitatory_Neurons	595255	424	15714	1404
Oligodendrocytes	317161	424	13327	748
Inhibitory_Neurons	235642	424	14318	556
Astrocyte	209779	424	13596	495
Microglia	76721	424	11782	181
OPCs	57325	424	11960	135
cell_subtype	ncells	nsubj	ngenes>1000count	cellperind
Mic.2	12513	352	6881	36
Mic.7	11717	351	7056	33
Mic.5	9989	418	6672	24
Mic.3	7655	374	5097	20
Mic.6	7343	328	5151	22
Mic.8	5182	376	4199	14
Mic.4	4370	380	3304	12
Mic.12	3510	397	2873	9
Mic.10	3403	302	2754	11
Mic.9	3199	343	2452	9
Mic.13	2391	322	2065	7
Mic.15	1867	208	1171	9
Mic.1	1209	185	1411	7
Mic.16	822	192	318	4
Mic.14	824	154	440	5
Mic.11	727	32	486	23
Ast.1	69858	415	13864	168
Ast.4	38768	423	12766	92
Ast.3	34661	424	12557	82
Ast.5	24883	398	11721	63
Ast.2	17666	283	9043	62
Ast.6	7709	300	8007	26
Ast.10	7316	166	7533	44
Ast.9	4892	79	6228	62
Ast.8	2247	41	2869	55
Ast.7	1779	137	2551	13
Oli.3	119189	424	13679	281
Oli.2	82858	424	12954	195
Oli.6	49362	423	12081	117
Oli.4	27827	401	8282	69
Oli.5	7901	416	7447	19
Oli.7	7936	262	6436	30
Oli.1	6042	418	5825	14
Oli.9	5732	401	4650	14
Oli.8	5178	126	4915	41
Oli.10	1919	182	1695	11
Oli.11	1925	308	1672	6
Oli.12	1292	347	1553	4
Inh.6	41391	424	12820	98
Inh.10	40302	423	13573	95
Inh.15	32357	423	13592	76
Inh.8	19507	417	11975	47
Inh.16	19238	423	12422	45
Inh.2	17899	421	11928	43
Inh.11	12411	423	10448	29
Inh.7	12247	422	10397	29
Inh.12	10348	420	9815	25
Inh.3	7675	420	10316	18
Inh.9	7120	422	9138	17
Inh.5	4317	418	8028	10
Inh.13	4208	417	8701	10
Inh.4	3853	408	7353	9
Inh.14	1899	34	4625	56
Inh.1	870	334	3004	3
cux2+_Exc.2	88559	419	15060	211
cux2+_Exc.4	77275	419	15479	184
cux2+_Exc.3	53164	418	15305	127
cux2+_Exc.6	49015	423	15023	116
cux2+_Exc.5	29248	421	14582	69
cux2+_Exc.7	27890	422	13815	66
cux2+_Exc.1	11356	237	12067	48
cux2-_Exc.9	95405	423	16037	226
cux2-_Exc.8	51230	421	14487	122
cux2-_Exc.10	29951	421	14396	71
cux2-_Exc.11	15851	423	12934	37
cux2-_Exc.12	14256	409	12660	35
cux2-_Exc.13	12123	415	12863	29
cux2-_Exc.14	10915	414	11813	26
cux2-_Exc.15	10694	416	12299	26
cux2-_Exc.16	3249	405	10312	8
OPC.2	38685	421	12672	92
OPC.1	10836	423	8990	26
OPC.3	5731	290	6482	20
MFOL	1573	392	2856	4
COP	500	253	651	2

## Sheet: Table S3
ct	ID	CHR	P0	P1	MODELCV.R2	MODELCV.PV	TWAS.Z	TWAS.P
CD4_ET	CTLA4	2	204732509	204738683	0.19	8.7e-48	-8.82181	1.13e-18
CD4_ET	ANKRD55	5	55395507	55529186	0.039	2.2e-10	9.81512	9.69e-23
CD4_ET	TMEM258	11	61535973	61560274	0.044	2.2e-11	-4.50404	6.67e-06
CD4_ET	RPS26	12	56435637	56438116	0.97	0	-4.22214	2.42e-05
CD4_ET	ORMDL3	17	38077294	38083854	0.12	3.2e-30	-4.77617	1.79e-06
CD4_ET	AIF1	6	31582961	31584798	0.084	1.3e-20	-4.8	1.59e-06
CD4_ET	HLA-A	6	29909037	29913661	0.15	5.7e-38	6.245	4.24e-10
CD4_ET	HLA-B	6	31321649	31324965	0.68	2e-243	-9.9869	1.74e-23
CD4_ET	HLA-DPB1	6	33043703	33054978	0.033	4.7e-09	-14.6539	1.27e-48
CD4_ET	HLA-DQB1	6	32627244	32636160	0.022	2.2e-06	-21.0272	3.7e-98
CD4_ET	HLA-DRB5	6	32485120	32498064	0.24	1.9e-60	15.1306	1.02e-51
CD4_ET	HLA-F	6	29690552	29706305	0.065	2.3e-16	-4.9852	6.19e-07
CD4_ET	XXbac-BPG299F13.17	6	31162977	31165814	0.62	1.2e-209	8.5742	9.98e-18
B_Mem	BLK	8	11351510	11422113	0.13	6e-33	-4.55172	5.32e-06
B_Mem	TMEM258	11	61535973	61560274	0.035	2.4e-09	-4.29461	1.75e-05
B_Mem	ORMDL3	17	38077294	38083854	0.16	5.4e-40	-5.50011	3.8e-08
B_Mem	SYNGR1	22	39745930	39781593	0.17	8.5e-43	4.78945	1.67e-06
B_Mem	HLA-A	6	29909037	29913661	0.17	7.9e-41	7.98861	1.36e-15
B_Mem	HLA-B	6	31321649	31324965	0.58	5e-188	-9.88993	4.6e-23
B_Mem	HLA-DPA1	6	33032346	33048552	0.24	1.7e-61	15.2865	9.41e-53
B_Mem	HLA-DQA1	6	32595956	32614839	0.12	6.9e-29	-26.3878	1.89e-153
B_Mem	HLA-DQA2	6	32709119	32714992	0.95	0	34.6456	5.2e-263
B_Mem	HLA-DQB2	6	32723875	32731311	0.58	7.4e-185	12.8174	1.31e-37
B_Mem	HLA-DRB1	6	32546546	32557625	0.45	5e-129	-17.2775	6.95e-67
B_Mem	HLA-DRB5	6	32485120	32498064	0.99	0	30.22	1.29e-200
B_Mem	NCR3	6	31556672	31560762	0.038	3.3e-10	6.50062	8e-11
B_Mem	TAPBP	6	33267471	33282164	0.049	1.7e-12	-6.3419	2.27e-10
B_Mem	XXbac-BPG299F13.17	6	31162977	31165814	0.56	1e-179	9.49344	2.24e-21
CD8_NC	CTLA4	2	204732509	204738683	0.18	1.7e-45	-8.85535	8.34e-19
CD8_NC	SESN3	11	94898704	94965705	0.044	1.9e-11	-4.31142	1.62e-05
CD8_NC	SPNS1	16	28985542	28995869	0.024	6.7e-07	4.05211	5.08e-05
CD8_NC	TMEM50B	21	34804792	34852318	0.13	1.4e-30	4.15753	3.22e-05
CD8_NC	UBASH3A	21	43824008	43867791	0.045	1.2e-11	-5.03305	4.83e-07
CD8_NC	AIF1	6	31582961	31584798	0.3	8.5e-79	8.59	8.73e-18
CD8_NC	C6orf48	6	31802385	31807541	0.027	1.1e-07	-5.608	2.04e-08
CD8_NC	HLA-A	6	29909037	29913661	0.088	9.7e-22	6.281	3.36e-10
CD8_NC	HLA-B	6	31321649	31324965	0.64	3.8e-221	-9.079	1.09e-19
CD8_NC	HLA-DPB1	6	33043703	33054978	0.03	2.2e-08	-14.247	4.69e-46
CD8_NC	HLA-DQA2	6	32709119	32714992	0.48	2.6e-141	42.009	0
CD8_NC	HLA-DRB5	6	32485120	32498064	0.42	1.3e-119	21.631	9.09e-104
CD8_NC	LST1	6	31553901	31556686	0.027	1.5e-07	10.991	4.21e-28
CD8_NC	NCR3	6	31556672	31560762	0.021	3.6e-06	9.188	3.99e-20
CD8_NC	TAPBP	6	33267471	33282164	0.079	1.7e-19	-5.803	6.51e-09
CD8_NC	UQCC2	6	33662070	33679504	0.023	9.8e-07	-12.861	7.43e-38
CD8_NC	XXbac-BPG299F13.17	6	31162977	31165814	0.75	2.2e-295	8.594	8.43e-18
CD8_NC	ZNRD1	6	30026676	30032686	0.022	1.6e-06	7.226	4.98e-13
CD8_ET	CTLA4	2	204732509	204738683	0.098	5.7e-24	-9.23	2.62e-20
CD8_ET	DDX6	11	118620034	118661858	0.028	8.7e-08	7.45727	8.83e-14
CD8_ET	FADS2	11	61560452	61634826	0.5	1.9e-148	-4.93753	7.91e-07
CD8_ET	TMEM258	11	61535973	61560274	0.064	4.1e-16	-4.14117	3.46e-05
CD8_ET	SPNS1	16	28985542	28995869	0.04	1.8e-10	4.18986	2.79e-05
CD8_ET	GSDMB	17	38060848	38076107	0.039	2e-10	-5.76897	7.98e-09
CD8_ET	ORMDL3	17	38077294	38083854	0.42	9.4e-118	-5.15501	2.54e-07
CD8_ET	RP11-973H7.1	18	12774650	12775922	0.17	2.5e-42	4.76979	1.84e-06
CD8_ET	UBASH3A	21	43824008	43867791	0.023	1.2e-06	-5.73	1e-08
CD8_ET	SYNGR1	22	39745930	39781593	0.32	4.1e-83	4.5086	6.53e-06
CD8_ET	UBE2L3	22	21903736	21978323	0.03	2.6e-08	-4.9888	6.08e-07
CD8_ET	AIF1	6	31582961	31584798	0.054	7.9e-14	13.6692	1.55e-42
CD8_ET	HLA-A	6	29909037	29913661	0.15	2e-36	11.4775	1.71e-30
CD8_ET	HLA-B	6	31321649	31324965	0.75	1.1e-294	-9.1978	3.65e-20
CD8_ET	HLA-C	6	31236526	31239907	0.25	1.4e-62	-7.6595	1.87e-14
CD8_ET	HLA-DMA	6	32916390	32936871	0.042	6.2e-11	-8.9439	3.76e-19
CD8_ET	HLA-DOB	6	32780540	32784825	0.054	8.6e-14	10.3615	3.71e-25
CD8_ET	HLA-DPA1	6	33032346	33048552	0.046	8.4e-12	-6.0323	1.62e-09
CD8_ET	HLA-DPB1	6	33043703	33054978	0.065	2.3e-16	-20.1834	1.37e-90
CD8_ET	HLA-DQA1	6	32595956	32614839	0.58	1.3e-185	38.6917	0
CD8_ET	HLA-DQA2	6	32709119	32714992	0.92	0	48.7508	0
CD8_ET	HLA-DQB1	6	32627244	32636160	0.16	2.6e-38	-5.0264	5e-07
CD8_ET	HLA-DRB1	6	32546546	32557625	0.043	3.1e-11	-24.6652	2.53e-134
CD8_ET	HLA-DRB5	6	32485120	32498064	0.93	0	15.8911	7.3e-57
CD8_ET	MICB	6	31462658	31478901	0.057	1.6e-14	4.7454	2.08e-06
CD8_ET	PSMB9	6	32811913	32827362	0.034	3.3e-09	6.3882	1.68e-10
CD8_ET	SKIV2L	6	31926857	31937532	0.027	1.2e-07	-16.4693	6.09e-61
CD8_ET	XXbac-BPG181B23.7	6	31362066	31363272	0.1	1.9e-25	10.5419	5.54e-26
CD8_ET	XXbac-BPG299F13.17	6	31162977	31165814	0.79	0	8.6797	3.97e-18
CD8_S100B	RPS26	12	56435637	56438116	0.96	0	-4.25487	2.09e-05
CD8_S100B	ORMDL3	17	38077294	38083854	0.12	6.6e-29	-5.01467	5.31e-07
CD8_S100B	TMEM50B	21	34804792	34852318	0.05	7e-13	3.7681	0.000164
CD8_S100B	HLA-A	6	29909037	29913661	0.051	4.2e-13	7.298	2.92e-13
CD8_S100B	HLA-B	6	31321649	31324965	0.58	4.3e-186	-9.246	2.34e-20
CD8_S100B	HLA-C	6	31236526	31239907	0.11	1.1e-26	-4.24	2.23e-05
CD8_S100B	HLA-DQB1	6	32627244	32636160	0.049	1.7e-12	-16.663	2.44e-62
CD8_S100B	LST1	6	31553901	31556686	0.025	3.5e-07	14.802	1.41e-49
CD8_S100B	XXbac-BPG299F13.17	6	31162977	31165814	0.52	5.2e-157	9.815	9.69e-23
DC	PSMD5-AS1	9	123587106	123616651	0.13	8.5e-31	3.7757	0.00016
DC	SYNGR1	22	39745930	39781593	0.023	1.3e-06	4.6445	3.41e-06
DC	HLA-A	6	29909037	29913661	0.25	3e-63	7.506	6.08e-14
DC	HLA-B	6	31321649	31324965	0.37	9.8e-101	-6.199	5.7e-10
DC	HLA-C	6	31236526	31239907	0.23	1.4e-56	3.759	0.000171
DC	HLA-DQA1	6	32595956	32614839	0.067	2e-16	-22.39	4.96e-111
DC	HLA-DQA2	6	32709119	32714992	0.97	0	43.394	0
DC	HLA-DQB1	6	32627244	32636160	0.1	1.1e-24	-5.365	8.09e-08
DC	HLA-DRB1	6	32546546	32557625	0.12	1.4e-29	-32.308	5.44e-229
DC	HLA-DRB5	6	32485120	32498064	0.98	0	27.802	4.15e-170
Mono_NC	RPS26	12	56435637	56438116	0.87	0	-4.54665	5.45e-06
Mono_NC	FLOT1	6	30695486	30710510	0.049	4.3e-12	12.1667	4.68e-34
Mono_NC	HLA-A	6	29909037	29913661	0.19	8.2e-46	6.8479	7.49e-12
Mono_NC	HLA-B	6	31321649	31324965	0.66	7e-221	-6.2567	3.93e-10
Mono_NC	HLA-C	6	31236526	31239907	0.26	1.3e-62	-5.1485	2.63e-07
Mono_NC	HLA-DPA1	6	33032346	33048552	0.091	2.6e-21	12.1257	7.72e-34
Mono_NC	HLA-DPB1	6	33043703	33054978	0.029	1e-07	11.4407	2.62e-30
Mono_NC	HLA-DQA1	6	32595956	32614839	0.51	1.1e-148	29.9796	1.81e-197
Mono_NC	HLA-DQA2	6	32709119	32714992	0.96	0	44.2403	0
Mono_NC	HLA-DQB1	6	32627244	32636160	0.55	4.3e-164	-7.1515	8.58e-13
Mono_NC	HLA-DRB1	6	32546546	32557625	0.13	1.6e-29	-6.4391	1.2e-10
Mono_NC	HLA-DRB5	6	32485120	32498064	0.88	0	27.9644	4.4e-172
Mono_NC	LST1	6	31553901	31556686	0.087	1.6e-20	15.0308	4.62e-51
Mono_NC	XXbac-BPG299F13.17	6	31162977	31165814	0.24	3.8e-57	7.6212	2.51e-14
NK_R	RPS26	12	56435637	56438116	0.93	0	-4.95019	7.41e-07
NK_R	HLA-A	6	29909037	29913661	0.072	1e-17	5.65922	1.52e-08
NK_R	HLA-B	6	31321649	31324965	0.58	3.3e-183	-9.85725	6.38e-23
NK_R	HLA-C	6	31236526	31239907	0.16	1.3e-39	-3.5873	0.000334
NK_R	HLA-DQB1	6	32627244	32636160	0.076	1.2e-18	-15.6288	4.63e-55
NK_R	HLA-DRB1	6	32546546	32557625	0.076	1.2e-18	-33.4989	5e-246
NK_R	HLA-DRB5	6	32485120	32498064	0.38	7.1e-103	9.58753	9.02e-22
NK_R	NCR3	6	31556672	31560762	0.036	1.7e-09	5.05724	4.25e-07
Mono_C	IRF5	7	128577666	128590089	0.021	4e-06	5.76342	8.24e-09
Mono_C	RPS26	12	56435637	56438116	0.89	0	-4.77206	1.82e-06
Mono_C	IFNGR2	21	34775202	34851655	0.041	1.2e-10	-4.47648	7.59e-06
Mono_C	C6orf48	6	31802385	31807541	0.022	2.4e-06	-6.17	6.83e-10
Mono_C	HLA-A	6	29909037	29913661	0.15	6.8e-37	9.923	3.31e-23
Mono_C	HLA-B	6	31321649	31324965	0.45	1.5e-129	-7.538	4.77e-14
Mono_C	HLA-C	6	31236526	31239907	0.27	5.6e-68	-6.393	1.63e-10
Mono_C	HLA-DQA1	6	32595956	32614839	0.36	1.2e-95	30.993	6.68e-211
Mono_C	HLA-DQA2	6	32709119	32714992	0.96	0	43.194	0
Mono_C	HLA-DQB1	6	32627244	32636160	0.61	7.5e-199	-9.75	1.84e-22
Mono_C	HLA-DRB1	6	32546546	32557625	0.12	5.7e-30	-21.794	2.65e-105
Mono_C	HLA-DRB5	6	32485120	32498064	0.98	0	27.252	1.58e-163
Mono_C	MICA	6	31371356	31383092	0.022	1.7e-06	6.479	9.24e-11
Mono_C	RPS18	6	33239787	33244287	0.12	1.8e-29	4.452	8.52e-06
CD4_NC	CTLA4	2	204732509	204738683	0.5	6.5e-149	-9.42488	4.31e-21
CD4_NC	ANKRD55	5	55395507	55529186	0.25	1.5e-63	9.61904	6.64e-22
CD4_NC	JAZF1	7	27870192	28220362	0.031	1.5e-08	-4.67455	2.95e-06
CD4_NC	BLK	8	11351510	11422113	0.066	1.5e-16	-5.08	3.77e-07
CD4_NC	ACAT1	11	107992243	108018503	0.11	1.4e-26	-4.37028	1.24e-05
CD4_NC	DDX6	11	118620034	118661858	0.031	2.1e-08	4.69542	2.66e-06
CD4_NC	FADS1	11	61567099	61596790	0.22	1.4e-54	-4.90426	9.38e-07
CD4_NC	FADS2	11	61560452	61634826	0.44	1.2e-127	-4.80347	1.56e-06
CD4_NC	SESN3	11	94898704	94965705	0.073	5.1e-18	-4.24773	2.16e-05
CD4_NC	SPNS1	16	28985542	28995869	0.056	3.5e-14	4.24226	2.21e-05
CD4_NC	UBASH3A	21	43824008	43867791	0.094	4.9e-23	-4.85181	1.22e-06
CD4_NC	UBE2L3	22	21903736	21978323	0.02	4.2e-06	-4.60139	4.2e-06
CD4_NC	C6orf48	6	31802385	31807541	0.048	2.8e-12	-6.083	1.18e-09
CD4_NC	CLIC1	6	31698358	31707540	0.027	1.6e-07	22.462	9.85e-112
CD4_NC	CUTA	6	33384219	33386094	0.026	1.7e-07	-9.294	1.49e-20
CD4_NC	HIST1H1D	6	26234440	26235216	0.026	1.8e-07	4.33	1.49e-05
CD4_NC	HLA-A	6	29909037	29913661	0.14	3e-35	6.449	1.12e-10
CD4_NC	HLA-B	6	31321649	31324965	0.68	2.1e-248	-9.81	1.02e-22
CD4_NC	HLA-DMA	6	32916390	32936871	0.056	3.7e-14	-10.525	6.62e-26
CD4_NC	HLA-DOB	6	32780540	32784825	0.12	8e-30	12.259	1.5e-34
CD4_NC	HLA-DPA1	6	33032346	33048552	0.057	1.8e-14	-4.397	1.1e-05
CD4_NC	HLA-DPB1	6	33043703	33054978	0.038	4.2e-10	-19.754	7.4e-87
CD4_NC	HLA-DQA1	6	32595956	32614839	0.037	9e-10	39.058	0
CD4_NC	HLA-DQA2	6	32709119	32714992	0.38	2.9e-105	44.059	0
CD4_NC	HLA-DQB1	6	32627244	32636160	0.15	8.4e-37	-8.786	1.55e-18
CD4_NC	HLA-DRB5	6	32485120	32498064	0.44	2.7e-124	23.547	1.36e-122
CD4_NC	HSD17B8	6	33172419	33174608	0.043	2.4e-11	9.802	1.11e-22
CD4_NC	HSPA1B	6	31795512	31798031	0.022	1.6e-06	6.679	2.4e-11
CD4_NC	LST1	6	31553901	31556686	0.074	1.9e-18	10.207	1.84e-24
CD4_NC	MICB	6	31462658	31478901	0.071	9.6e-18	7.903	2.73e-15
CD4_NC	NCR3	6	31556672	31560762	0.032	8.3e-09	10.311	6.26e-25
CD4_NC	SKIV2L	6	31926857	31937532	0.035	1.6e-09	-17.807	6.22e-71
CD4_NC	TAPBP	6	33267471	33282164	0.16	6.9e-40	-5.862	4.56e-09
CD4_NC	UQCC2	6	33662070	33679504	0.04	1.4e-10	-13.396	6.37e-41
CD4_NC	VARS2	6	30876019	30894236	0.031	2.1e-08	6.471	9.72e-11
CD4_NC	XXbac-BPG181B23.7	6	31362066	31363272	0.27	1.6e-70	6.674	2.5e-11
CD4_NC	XXbac-BPG299F13.17	6	31162977	31165814	0.87	0	8.405	4.29e-17
CD4_NC	ZFP57	6	29640169	29648887	0.49	3.6e-145	-6.413	1.42e-10
B_IN	FCRL3	1	157644111	157670647	0.083	2e-20	4.34032	1.42e-05
B_IN	REL	2	61108656	61158745	0.094	3.9e-23	5.98082	2.22e-09
B_IN	BLK	8	11351510	11422113	0.1	3.6e-25	-4.5951	4.33e-06
B_IN	TMEM258	11	61535973	61560274	0.025	3e-07	-4.41238	1.02e-05
B_IN	ORMDL3	17	38077294	38083854	0.22	3e-56	-5.69753	1.22e-08
B_IN	TMEM50B	21	34804792	34852318	0.035	2.5e-09	4.34867	1.37e-05
B_IN	RPL3	22	39708887	39716394	0.037	7.1e-10	-5.0703	3.97e-07
B_IN	SYNGR1	22	39745930	39781593	0.024	5e-07	4.8575	1.19e-06
B_IN	C6orf48	6	31802385	31807541	0.049	1.2e-12	3.959	7.52e-05
B_IN	HLA-A	6	29909037	29913661	0.25	1.6e-63	8.185	2.71e-16
B_IN	HLA-B	6	31321649	31324965	0.48	1.9e-142	-8.768	1.83e-18
B_IN	HLA-DMA	6	32916390	32936871	0.028	6.9e-08	-9.838	7.73e-23
B_IN	HLA-DPA1	6	33032346	33048552	0.26	3.2e-65	14.841	7.98e-50
B_IN	HLA-DPB1	6	33043703	33054978	0.32	4.4e-84	-9.052	1.4e-19
B_IN	HLA-DQA1	6	32595956	32614839	0.25	3.1e-63	-6.779	1.21e-11
B_IN	HLA-DQA2	6	32709119	32714992	0.99	0	44.722	0
B_IN	HLA-DQB2	6	32723875	32731311	0.7	1.8e-256	18.164	9.94e-74
B_IN	HLA-DRB1	6	32546546	32557625	0.47	1.9e-138	-18.659	1.08e-77
B_IN	HLA-DRB5	6	32485120	32498064	0.99	0	27.82	2.49e-170
B_IN	HLA-F	6	29690552	29706305	0.062	1.7e-15	-4.706	2.52e-06
B_IN	LST1	6	31553901	31556686	0.089	8.8e-22	10.607	2.76e-26
B_IN	TAPBP	6	33267471	33282164	0.06	3.2e-15	-6.199	5.68e-10
B_IN	XXbac-BPG299F13.17	6	31162977	31165814	0.63	5.2e-214	12.11	9.37e-34
NK	FCGR2A	1	161475220	161493803	0.15	1.5e-36	4.16227	3.15e-05
NK	FCRL3	1	157644111	157670647	0.072	8.3e-18	4.42488	9.65e-06
NK	IRF5	7	128577666	128590089	0.021	3.8e-06	4.77954	1.76e-06
NK	DDX6	11	118620034	118661858	0.023	1.2e-06	7.93153	2.16e-15
NK	FADS1	11	61567099	61596790	0.025	4.5e-07	-4.41662	1e-05
NK	FADS2	11	61560452	61634826	0.29	1.3e-75	-4.87198	1.1e-06
NK	RPS26	12	56435637	56438116	0.96	0	-4.3343	1.46e-05
NK	ORMDL3	17	38077294	38083854	0.36	5.6e-99	-4.27	1.96e-05
NK	RP11-973H7.1	18	12774650	12775922	0.21	4.5e-51	4.7197	2.36e-06
NK	TMEM50B	21	34804792	34852318	0.11	9.9e-28	4.29522	1.75e-05
NK	SYNGR1	22	39745930	39781593	0.46	4.3e-133	4.25109	2.13e-05
NK	UBE2L3	22	21903736	21978323	0.031	1.7e-08	-4.14073	3.46e-05
NK	HIST1H1D	6	26234440	26235216	0.032	8e-09	4.35744	1.32e-05
NK	HLA-A	6	29909037	29913661	0.23	4.5e-59	9.44882	3.43e-21
NK	HLA-B	6	31321649	31324965	0.74	2.3e-290	-8.74455	2.24e-18
NK	HLA-C	6	31236526	31239907	0.28	1.8e-71	-4.96468	6.88e-07
NK	HLA-DQA1	6	32595956	32614839	0.37	2e-99	42.5188	0
NK	HLA-DQA2	6	32709119	32714992	0.82	0	34.842	5.62e-266
NK	HLA-DQB1	6	32627244	32636160	0.11	1.3e-27	-14.7111	5.47e-49
NK	HLA-DRB5	6	32485120	32498064	0.45	2.1e-128	13.0254	8.78e-39
NK	NCR3	6	31556672	31560762	0.22	5e-55	5.62	1.91e-08
NK	XXbac-BPG299F13.17	6	31162977	31165814	0.78	0	9.96781	2.11e-23
Plasma	RPS26	12	56435637	56438116	0.69	6e-205	-4.6555	3.23e-06
Plasma	TXNDC11	16	11772936	11836734	0.048	2.3e-10	-3.9211	8.82e-05
Plasma	CD40	20	44746911	44758502	0.038	2e-08	5.80908	6.28e-09
Plasma	HLA-A	6	29909037	29913661	0.13	9.3e-27	9.108	8.38e-20
Plasma	HLA-B	6	31321649	31324965	0.29	2.5e-61	-5.988	2.13e-09
Plasma	HLA-DQA1	6	32595956	32614839	0.1	1.4e-20	18.951	4.35e-80
Plasma	HLA-DQA2	6	32709119	32714992	0.87	0	35.876	7.15e-282
Plasma	HLA-DQB1	6	32627244	32636160	0.18	2.6e-36	-10.632	2.12e-26
Plasma	HLA-DRB5	6	32485120	32498064	0.85	0	27.729	3.12e-169
Plasma	HLA-F	6	29690552	29706305	0.029	6.7e-07	-6.776	1.24e-11

## Sheet: Table S4
ct	ID	CHR	P0	P1	MODELCV.R2	MODELCV.PV	TWAS.Z	TWAS.P
CD4_ET	ANKRD55	5	55395507	55529186	0.039	2.2e-10	3.9813	6.85e-05
CD4_ET	AIF1	6	31582961	31584798	0.084	1.3e-20	5.439	5.37e-08
CD4_ET	BTN2A1	6	26458150	26476849	0.032	8.5e-09	5.945	2.76e-09
CD4_ET	BTN3A2	6	26365387	26378546	0.57	2.6e-184	-9.94	2.8e-23
CD4_ET	HLA-A	6	29909037	29913661	0.15	5.7e-38	-5.853	4.83e-09
CD4_ET	HLA-C	6	31236526	31239907	0.25	1.1e-63	-6.514	7.29e-11
CD4_ET	HLA-DPB1	6	33043703	33054978	0.033	4.7e-09	4.103	4.08e-05
CD4_ET	HLA-DQB1	6	32627244	32636160	0.022	2.2e-06	-10.899	1.17e-27
CD4_ET	HLA-DRB5	6	32485120	32498064	0.24	1.9e-60	-5.974	2.32e-09
CD4_ET	PSMB9	6	32811913	32827362	0.028	1e-07	5.511	3.57e-08
CD4_ET	XXbac-BPG299F13.17	6	31162977	31165814	0.62	1.2e-209	-3.923	8.76e-05
B_Mem	BLK	8	11351510	11422113	0.13	6e-33	-8.033	9.51e-16
B_Mem	TMEM80	11	695428	705028	0.039	2.1e-10	-5.68466	1.31e-08
B_Mem	ORMDL3	17	38077294	38083854	0.16	5.4e-40	-4.56679	4.95e-06
B_Mem	BTN3A2	6	26365387	26378546	0.25	8.9e-63	-9.376	6.83e-21
B_Mem	C6orf48	6	31802385	31807541	0.034	3.6e-09	6.627	3.43e-11
B_Mem	HLA-A	6	29909037	29913661	0.17	7.9e-41	-4.672	2.98e-06
B_Mem	HLA-C	6	31236526	31239907	0.47	3.7e-139	-13.445	3.31e-41
B_Mem	HLA-DQA1	6	32595956	32614839	0.12	6.9e-29	4.747	2.06e-06
B_Mem	HLA-DQA2	6	32709119	32714992	0.95	0	-7.072	1.53e-12
B_Mem	HLA-DQB1	6	32627244	32636160	0.35	3e-94	-10.817	2.87e-27
B_Mem	HLA-DRB1	6	32546546	32557625	0.45	5e-129	7.446	9.6e-14
B_Mem	HLA-DRB5	6	32485120	32498064	0.99	0	-6.054	1.41e-09
B_Mem	PSMB9	6	32811913	32827362	0.035	1.9e-09	8.503	1.85e-17
CD8_NC	TMEM80	11	695428	705028	0.1	1.6e-24	-5.44762	5.1e-08
CD8_NC	BTN2A1	6	26458150	26476849	0.073	3.3e-18	7.1572	8.24e-13
CD8_NC	BTN3A2	6	26365387	26378546	0.52	8.1e-159	-9.88	5.08e-23
CD8_NC	C6orf48	6	31802385	31807541	0.027	1.1e-07	7.852	4.1e-15
CD8_NC	HLA-A	6	29909037	29913661	0.088	9.7e-22	-4.8734	1.1e-06
CD8_NC	HLA-C	6	31236526	31239907	0.22	6.3e-55	-5.7945	6.85e-09
CD8_NC	HLA-DQB1	6	32627244	32636160	0.094	4.4e-23	-11.9795	4.55e-33
CD8_NC	HLA-DRB5	6	32485120	32498064	0.42	1.3e-119	-5.6128	1.99e-08
CD8_NC	ZNRD1	6	30026676	30032686	0.022	1.6e-06	-4.8924	9.96e-07
CD8_ET	IRF7	11	612553	615999	0.023	9.5e-07	5.9285	3.06e-09
CD8_ET	TMEM80	11	695428	705028	0.073	4e-18	-4.6511	3.3e-06
CD8_ET	ORMDL3	17	38077294	38083854	0.42	9.4e-118	-4.51758	6.26e-06
CD8_ET	UBE2L3	22	21903736	21978323	0.03	2.6e-08	-7.2168	5.32e-13
CD8_ET	AIF1	6	31582961	31584798	0.054	7.9e-14	-6.1466	7.92e-10
CD8_ET	BTN2A1	6	26458150	26476849	0.073	4.2e-18	6.2134	5.19e-10
CD8_ET	BTN3A2	6	26365387	26378546	0.64	5.2e-220	-9.961	2.26e-23
CD8_ET	HLA-C	6	31236526	31239907	0.25	1.4e-62	-8.1704	3.07e-16
CD8_ET	HLA-DPA1	6	33032346	33048552	0.046	8.4e-12	6.7458	1.52e-11
CD8_ET	HLA-DPB1	6	33043703	33054978	0.065	2.3e-16	5.0919	3.54e-07
CD8_ET	HLA-DQA1	6	32595956	32614839	0.58	1.3e-185	-8.6512	5.1e-18
CD8_ET	HLA-DQA2	6	32709119	32714992	0.92	0	-4.2541	2.1e-05
CD8_ET	HLA-DQB1	6	32627244	32636160	0.16	2.6e-38	-9.9812	1.84e-23
CD8_ET	HLA-DRB1	6	32546546	32557625	0.043	3.1e-11	6.5703	5.02e-11
CD8_ET	HLA-DRB5	6	32485120	32498064	0.93	0	-7.493	6.73e-14
CD8_ET	HLA-F	6	29690552	29706305	0.097	9.5e-24	-4.3722	1.23e-05
CD8_ET	MICB	6	31462658	31478901	0.057	1.6e-14	-9.1387	6.32e-20
CD8_ET	PSMB9	6	32811913	32827362	0.034	3.3e-09	5.4413	5.29e-08
CD8_ET	SKIV2L	6	31926857	31937532	0.027	1.2e-07	-6.6213	3.56e-11
CD8_ET	XXbac-BPG181B23.7	6	31362066	31363272	0.1	1.9e-25	5.8043	6.46e-09
CD8_S100B	ORMDL3	17	38077294	38083854	0.12	6.6e-29	-3.7979	0.000146
CD8_S100B	BTN3A2	6	26365387	26378546	0.3	1.8e-78	-9.957	2.34e-23
CD8_S100B	HLA-C	6	31236526	31239907	0.11	1.1e-26	-5.719	1.07e-08
CD8_S100B	HLA-DQB1	6	32627244	32636160	0.049	1.7e-12	-12.399	2.65e-35
CD8_S100B	HLA-DRB5	6	32485120	32498064	0.086	4.9e-21	-7.279	3.37e-13
DC	BTN3A2	6	26365387	26378546	0.037	1.1e-09	-8.983	2.64e-19
DC	HLA-A	6	29909037	29913661	0.25	3e-63	-5.095	3.49e-07
DC	HLA-C	6	31236526	31239907	0.23	1.4e-56	-9.404	5.25e-21
DC	HLA-DQA2	6	32709119	32714992	0.97	0	-6.163	7.14e-10
DC	HLA-DQB1	6	32627244	32636160	0.1	1.1e-24	-7.16	8.08e-13
DC	HLA-DRB1	6	32546546	32557625	0.12	1.4e-29	6.712	1.92e-11
Mono_NC	BTN3A2	6	26365387	26378546	0.15	3.3e-36	-8.595	8.31e-18
Mono_NC	FLOT1	6	30695486	30710510	0.049	4.3e-12	4.149	3.33e-05
Mono_NC	HLA-A	6	29909037	29913661	0.19	8.2e-46	-5.24	1.6e-07
Mono_NC	HLA-B	6	31321649	31324965	0.66	7e-221	-4.072	4.66e-05
Mono_NC	HLA-C	6	31236526	31239907	0.26	1.3e-62	-9.661	4.41e-22
Mono_NC	HLA-DPB1	6	33043703	33054978	0.029	1e-07	-4.267	1.98e-05
Mono_NC	HLA-DQA1	6	32595956	32614839	0.51	1.1e-148	-11.226	3.03e-29
Mono_NC	HLA-DQA2	6	32709119	32714992	0.96	0	-6.694	2.17e-11
Mono_NC	HLA-DRB1	6	32546546	32557625	0.13	1.6e-29	8.212	2.17e-16
Mono_NC	HLA-DRB5	6	32485120	32498064	0.88	0	-4.641	3.46e-06
Mono_NC	PSMB9	6	32811913	32827362	0.034	9.4e-09	5.702	1.18e-08
NK_R	BTN3A2	6	26365387	26378546	0.17	8.3e-42	-9.1619	5.1e-20
NK_R	HLA-A	6	29909037	29913661	0.072	1e-17	-4.3779	1.2e-05
NK_R	HLA-C	6	31236526	31239907	0.16	1.3e-39	-7.5497	4.36e-14
NK_R	HLA-DQB1	6	32627244	32636160	0.076	1.2e-18	-5.3787	7.5e-08
NK_R	HLA-DRB1	6	32546546	32557625	0.076	1.2e-18	9.6291	6.02e-22
Mono_C	IRF5	7	128577666	128590089	0.021	4e-06	12.273	1.26e-34
Mono_C	BTN3A2	6	26365387	26378546	0.13	2.7e-32	-7.552	4.3e-14
Mono_C	C6orf48	6	31802385	31807541	0.022	2.4e-06	7.657	1.91e-14
Mono_C	HLA-C	6	31236526	31239907	0.27	5.6e-68	-10.617	2.49e-26
Mono_C	HLA-DQA1	6	32595956	32614839	0.36	1.2e-95	-10.577	3.81e-26
Mono_C	HLA-DQA2	6	32709119	32714992	0.96	0	-6.021	1.73e-09
Mono_C	HLA-DRB1	6	32546546	32557625	0.12	5.7e-30	7.475	7.71e-14
Mono_C	PSMB9	6	32811913	32827362	0.055	6.9e-14	4.866	1.14e-06
Mono_C	XXbac-BPG299F13.17	6	31162977	31165814	0.18	3.4e-44	-4.526	6.02e-06
CD4_NC	HOTAIRM1	7	27135266	27139884	0.027	1.4e-07	-4.24324	2.2e-05
CD4_NC	BLK	8	11351510	11422113	0.066	1.5e-16	-7.70609	1.3e-14
CD4_NC	TMEM80	11	695428	705028	0.16	2.9e-38	-5.66742	1.45e-08
CD4_NC	RP11-542M13.3	16	85968887	85969829	0.021	3.2e-06	5.5825	2.37e-08
CD4_NC	UBE2L3	22	21903736	21978323	0.02	4.2e-06	-7.38495	1.53e-13
CD4_NC	BTN2A1	6	26458150	26476849	0.23	4.2e-58	5.91	3.43e-09
CD4_NC	BTN2A2	6	26383324	26395102	0.052	3.1e-13	8.455	2.8e-17
CD4_NC	BTN3A2	6	26365387	26378546	0.79	0	-9.991	1.68e-23
CD4_NC	C6orf48	6	31802385	31807541	0.048	2.8e-12	8.099	5.55e-16
CD4_NC	HLA-A	6	29909037	29913661	0.14	3e-35	-6.961	3.37e-12
CD4_NC	HLA-C	6	31236526	31239907	0.26	1.3e-67	-5.841	5.18e-09
CD4_NC	HLA-DMA	6	32916390	32936871	0.056	3.7e-14	13.37	9.07e-41
CD4_NC	HLA-DPA1	6	33032346	33048552	0.057	1.8e-14	4.504	6.68e-06
CD4_NC	HLA-DPB1	6	33043703	33054978	0.038	4.2e-10	6.381	1.76e-10
CD4_NC	HLA-DQA1	6	32595956	32614839	0.037	9e-10	-4.491	7.08e-06
CD4_NC	HLA-DQB1	6	32627244	32636160	0.15	8.4e-37	-10.243	1.27e-24
CD4_NC	HLA-DRB5	6	32485120	32498064	0.44	2.7e-124	-5.835	5.37e-09
CD4_NC	HSPA1B	6	31795512	31798031	0.022	1.6e-06	-9.545	1.36e-21
CD4_NC	LST1	6	31553901	31556686	0.074	1.9e-18	-4.57	4.88e-06
CD4_NC	MICA	6	31371356	31383092	0.067	7.7e-17	-5.822	5.8e-09
CD4_NC	PSMB9	6	32811913	32827362	0.037	8.6e-10	6.165	7.04e-10
CD4_NC	SKIV2L	6	31926857	31937532	0.035	1.6e-09	-6.82	9.13e-12
CD4_NC	VARS2	6	30876019	30894236	0.031	2.1e-08	-11.943	7.06e-33
CD4_NC	ZFP57	6	29640169	29648887	0.49	3.6e-145	7.439	1.02e-13
CD4_NC	ZSCAN16-AS1	6	28089573	28105071	0.022	2.2e-06	7.939	2.03e-15
B_IN	BLK	8	11351510	11422113	0.1	3.6e-25	-8.08985	5.97e-16
B_IN	TMEM80	11	695428	705028	0.046	7e-12	-4.51044	6.47e-06
B_IN	ORMDL3	17	38077294	38083854	0.22	3e-56	-4.114	3.89e-05
B_IN	BTN3A2	6	26365387	26378546	0.26	3.1e-66	-9.673	3.91e-22
B_IN	HLA-A	6	29909037	29913661	0.25	1.6e-63	-4.909	9.14e-07
B_IN	HLA-C	6	31236526	31239907	0.49	8.3e-144	-12.797	1.71e-37
B_IN	HLA-DPB1	6	33043703	33054978	0.32	4.4e-84	4.493	7.02e-06
B_IN	HLA-DQA1	6	32595956	32614839	0.25	3.1e-63	4.472	7.76e-06
B_IN	HLA-DQA2	6	32709119	32714992	0.99	0	-6.167	6.96e-10
B_IN	HLA-DQB1	6	32627244	32636160	0.41	6.3e-114	-9.739	2.05e-22
B_IN	HLA-DQB2	6	32723875	32731311	0.7	1.8e-256	-4.198	2.69e-05
B_IN	HLA-DRB1	6	32546546	32557625	0.47	1.9e-138	6.401	1.54e-10
B_IN	HLA-DRB5	6	32485120	32498064	0.99	0	-3.955	7.65e-05
B_IN	LST1	6	31553901	31556686	0.089	8.8e-22	4.269	1.96e-05
B_IN	XXbac-BPG299F13.17	6	31162977	31165814	0.63	5.2e-214	-4.413	1.02e-05
NK	LINC00954	2	20068621	20084808	0.08	9.2e-20	-4.6037	4.15e-06
NK	IRF5	7	128577666	128590089	0.021	3.8e-06	7.62	2.46e-14
NK	TMEM80	11	695428	705028	0.09	4.6e-22	-5.37394	7.7e-08
NK	UBE2L3	22	21903736	21978323	0.031	1.7e-08	-7.66955	1.73e-14
NK	BTN2A1	6	26458150	26476849	0.095	3.2e-23	5.4245	5.81e-08
NK	BTN2A2	6	26383324	26395102	0.044	2.2e-11	5.1548	2.54e-07
NK	BTN3A2	6	26365387	26378546	0.73	2.2e-280	-9.8702	5.61e-23
NK	HLA-A	6	29909037	29913661	0.23	4.5e-59	-4.1693	3.05e-05
NK	HLA-C	6	31236526	31239907	0.28	1.8e-71	-7.5393	4.73e-14
NK	HLA-DPA1	6	33032346	33048552	0.02	4.9e-06	4.4059	1.05e-05
NK	HLA-DQB1	6	32627244	32636160	0.11	1.3e-27	-5.9662	2.43e-09
NK	HLA-DRB1	6	32546546	32557625	0.037	8.4e-10	5.6974	1.22e-08
NK	HLA-DRB5	6	32485120	32498064	0.45	2.1e-128	-4.9004	9.56e-07
NK	PSMB9	6	32811913	32827362	0.08	8.5e-20	5.5399	3.03e-08
Plasma	BTN3A2	6	26365387	26378546	0.17	3.3e-35	-9.88	5.08e-23
Plasma	HLA-C	6	31236526	31239907	0.18	9.9e-36	-12.047	2.02e-33
Plasma	HLA-DQA2	6	32709119	32714992	0.87	0	-5.607	2.06e-08
Plasma	HLA-DRB5	6	32485120	32498064	0.85	0	-4.419	9.91e-06

## Sheet: Table S5
ct	ID	CHR	P0	P1	MODELCV.R2	MODELCV.PV	TWAS.Z	TWAS.P
CD4_ET	TNFRSF14	1	2487078	2496821	0.024	7.5e-07	-4.6568	3.21e-06
CD4_ET	LCLAT1	2	30670092	30867091	0.09	4.6e-22	-4.9926	5.96e-07
CD4_ET	CCDC66	3	56591189	56655846	0.078	2.9e-19	-4.83886	1.31e-06
CD4_ET	MANBA	4	103552660	103682151	0.041	1.1e-10	5.1161	3.12e-07
CD4_ET	CAMK4	5	110559351	110830584	0.024	8.1e-07	5.8666	4.45e-09
CD4_ET	AHI1	6	135604670	135818914	0.15	9.4e-37	-7.05151	1.77e-12
CD4_ET	KDELR2	7	6485584	6523873	0.09	3.8e-22	3.97555	7.02e-05
CD4_ET	PSMD5-AS1	9	123587106	123616651	0.58	2.1e-189	4.8972	9.72e-07
CD4_ET	PLEKHA1	10	124134212	124191867	0.029	4.1e-08	-3.9478	7.89e-05
CD4_ET	PRKCQ-AS1	10	6622381	6658414	0.22	5.6e-55	-7.4951	6.63e-14
CD4_ET	TMEM258	11	61535973	61560274	0.044	2.2e-11	-6.10635	1.02e-09
CD4_ET	ARL6IP4	12	123464607	123467456	0.021	2.9e-06	4.81483	1.47e-06
CD4_ET	KRT1	12	53068520	53074191	0.39	6e-108	3.97385	7.07e-05
CD4_ET	RPS26	12	56435637	56438116	0.97	0	9.26983	1.86e-20
CD4_ET	DDX5	17	62495734	62504317	0.049	1.6e-12	5.24	1.61e-07
CD4_ET	HOXB-AS1	17	46620913	46628610	0.094	4.5e-23	4.43724	9.11e-06
CD4_ET	HOXB2	17	46618256	46623441	0.19	2.9e-48	4.42484	9.65e-06
CD4_ET	ORMDL3	17	38077294	38083854	0.12	3.2e-30	18.6029	3.04e-77
CD4_ET	STMN3	20	62271061	62284780	0.16	1.6e-39	4.0742	4.62e-05
CD4_ET	BTN3A2	6	26365387	26378546	0.57	2.6e-184	-6.2566	3.93e-10
CD4_ET	HLA-DQB1	6	32627244	32636160	0.022	2.2e-06	-6.8644	6.68e-12
CD4_ET	HLA-DRB5	6	32485120	32498064	0.24	1.9e-60	10.037	1.05e-23
CD4_ET	PSMB9	6	32811913	32827362	0.028	1e-07	9.7056	2.85e-22
B_Mem	AP1S3	2	224616403	224702744	0.031	1.5e-08	5.5974	2.18e-08
B_Mem	AHI1	6	135604670	135818914	0.13	5.3e-31	-7.1648	7.79e-13
B_Mem	KDELR2	7	6485584	6523873	0.096	1.3e-23	3.9272	8.59e-05
B_Mem	PSMD5-AS1	9	123587106	123616651	0.46	4e-133	5.2532	1.49e-07
B_Mem	TMEM258	11	61535973	61560274	0.035	2.4e-09	-7.7436	9.66e-15
B_Mem	IFNG-AS1	12	68383225	68628466	0.054	8.2e-14	-4.1989	2.68e-05
B_Mem	ISCU	12	108956358	108963160	0.038	4.6e-10	4.1824	2.88e-05
B_Mem	RPS26	12	56435637	56438116	0.97	0	8.1312	4.25e-16
B_Mem	DDX5	17	62495734	62504317	0.035	2.1e-09	4.5875	4.49e-06
B_Mem	MILR1	17	62461569	62464760	0.02	5.9e-06	-3.9589	7.53e-05
B_Mem	ORMDL3	17	38077294	38083854	0.16	5.4e-40	21.4953	1.72e-102
B_Mem	BTN3A2	6	26365387	26378546	0.25	8.9e-63	-6.2585	3.89e-10
B_Mem	C6orf48	6	31802385	31807541	0.034	3.6e-09	5.064	4.11e-07
B_Mem	HLA-DQA1	6	32595956	32614839	0.12	6.9e-29	7.2049	5.81e-13
B_Mem	HLA-DQA2	6	32709119	32714992	0.95	0	18.7271	2.98e-78
B_Mem	HLA-DQB1	6	32627244	32636160	0.35	3e-94	-18.6294	1.86e-77
B_Mem	HLA-DQB2	6	32723875	32731311	0.58	7.4e-185	26.619	4.09e-156
B_Mem	HLA-DRB5	6	32485120	32498064	0.99	0	16.3408	5.06e-60
B_Mem	NCR3	6	31556672	31560762	0.038	3.3e-10	4.8598	1.17e-06
B_Mem	PSMB9	6	32811913	32827362	0.035	1.9e-09	7.1178	1.1e-12
CD8_NC	CD247	1	167399877	167487847	0.072	6.7e-18	-9.32161	1.15e-20
CD8_NC	TNFRSF14	1	2487078	2496821	0.039	2.2e-10	-4.51369	6.37e-06
CD8_NC	USF1	1	161009041	161015767	0.1	1e-24	5.21052	1.88e-07
CD8_NC	LCLAT1	2	30670092	30867091	0.19	1.9e-46	-4.92426	8.47e-07
CD8_NC	RBM6	3	49977440	50137478	0.02	5.3e-06	-4.4793	7.49e-06
CD8_NC	MANBA	4	103552660	103682151	0.047	3.6e-12	4.6298	3.66e-06
CD8_NC	AHI1	6	135604670	135818914	0.21	3.9e-51	-7.0684	1.57e-12
CD8_NC	NUP43	6	150045451	150070801	0.02	6e-06	-4.4061	1.05e-05
CD8_NC	PSMD5-AS1	9	123587106	123616651	0.7	7.8e-262	5.1598	2.47e-07
CD8_NC	PLEKHA1	10	124134212	124191867	0.084	8.5e-21	-4.09781	4.17e-05
CD8_NC	PRKCQ-AS1	10	6622381	6658414	0.27	2.4e-69	-7.56734	3.81e-14
CD8_NC	CCS	11	66360292	66373490	0.019	6.6e-06	5.09361	3.51e-07
CD8_NC	TMEM258	11	61535973	61560274	0.044	1.7e-11	-7.31127	2.65e-13
CD8_NC	IFNG-AS1	12	68383225	68628466	0.076	1e-18	-4.3171	1.58e-05
CD8_NC	MPHOSPH9	12	123636867	123728561	0.029	4e-08	-6.5299	6.58e-11
CD8_NC	DDX5	17	62495734	62504317	0.069	3.7e-17	4.94101	7.77e-07
CD8_NC	HOXB2	17	46618256	46623441	0.21	1.7e-53	4.27676	1.9e-05
CD8_NC	HOXB4	17	46652875	46657473	0.05	9.7e-13	5.1426	2.71e-07
CD8_NC	ORMDL3	17	38077294	38083854	0.24	2.7e-61	13.4342	3.81e-41
CD8_NC	STMN3	20	62271061	62284780	0.2	5.7e-49	4.39532	1.11e-05
CD8_NC	BTN2A1	6	26458150	26476849	0.073	3.3e-18	5.4508	5.01e-08
CD8_NC	BTN3A2	6	26365387	26378546	0.52	8.1e-159	-6.46	1.05e-10
CD8_NC	C6orf48	6	31802385	31807541	0.027	1.1e-07	5.167	2.38e-07
CD8_NC	HLA-DPB1	6	33043703	33054978	0.03	2.2e-08	-6.7683	1.3e-11
CD8_NC	HLA-DQA2	6	32709119	32714992	0.48	2.6e-141	18.9425	5.1e-80
CD8_NC	HLA-DQB1	6	32627244	32636160	0.094	4.4e-23	-6.0894	1.13e-09
CD8_NC	HLA-DRB5	6	32485120	32498064	0.42	1.3e-119	13.8447	1.37e-43
CD8_NC	HLA-G	6	29794744	29798902	0.25	1e-64	4.1026	4.09e-05
CD8_ET	TNFRSF14	1	2487078	2496821	0.045	1.4e-11	-5.77041	7.91e-09
CD8_ET	IL18R1	2	102927989	103015218	0.034	4.5e-09	15.8566	1.27e-56
CD8_ET	PLCL1	2	198669426	199437305	0.044	2.1e-11	4.94325	7.68e-07
CD8_ET	MANBA	4	103552660	103682151	0.024	5.4e-07	4.5099	6.49e-06
CD8_ET	AHI1	6	135604670	135818914	0.27	8.4e-70	-7.2502	4.16e-13
CD8_ET	PSMD5-AS1	9	123587106	123616651	0.76	1.3e-304	5.10189	3.36e-07
CD8_ET	HHEX	10	94447945	94455403	0.066	2e-16	6.0283	1.66e-09
CD8_ET	DDX6	11	118620034	118661858	0.028	8.7e-08	5.44075	5.31e-08
CD8_ET	FADS1	11	61567099	61596790	0.091	2.4e-22	-8.23659	1.77e-16
CD8_ET	FADS2	11	61560452	61634826	0.5	1.9e-148	-6.91467	4.69e-12
CD8_ET	TMEM258	11	61535973	61560274	0.064	4.1e-16	-6.458	1.06e-10
CD8_ET	TP53I11	11	44907454	44972840	0.22	1.2e-55	-5.02707	4.98e-07
CD8_ET	LINC00987	12	9392599	9395635	0.29	6.5e-74	4.2724	1.93e-05
CD8_ET	MPHOSPH9	12	123636867	123728561	0.031	1.4e-08	-6.2806	3.37e-10
CD8_ET	GCHFR	15	41056218	41059906	0.046	5.9e-12	4.73178	2.23e-06
CD8_ET	DDX5	17	62495734	62504317	0.098	5.5e-24	4.956	7.2e-07
CD8_ET	GSDMB	17	38060848	38076107	0.039	2e-10	20.3555	4.15e-92
CD8_ET	HOXB-AS1	17	46620913	46628610	0.2	6e-51	4.6754	2.93e-06
CD8_ET	HOXB2	17	46618256	46623441	0.3	1.6e-78	4.1739	2.99e-05
CD8_ET	HOXB4	17	46652875	46657473	0.037	6.1e-10	4.6071	4.08e-06
CD8_ET	ORMDL3	17	38077294	38083854	0.42	9.4e-118	21.983	4.19e-107
CD8_ET	TRIM47	17	73870242	73874656	0.07	1.6e-17	4.7307	2.24e-06
CD8_ET	STMN3	20	62271061	62284780	0.14	1e-33	4.31514	1.6e-05
CD8_ET	SAMSN1	21	15857549	15955723	0.14	3.6e-33	-4.565	5e-06
CD8_ET	MEI1	22	42095503	42195460	0.028	8.6e-08	6.0405	1.54e-09
CD8_ET	BTN3A2	6	26365387	26378546	0.64	5.2e-220	-6.2887	3.2e-10
CD8_ET	HLA-A	6	29909037	29913661	0.15	2e-36	-4.8281	1.38e-06
CD8_ET	HLA-C	6	31236526	31239907	0.25	1.4e-62	-5.2853	1.26e-07
CD8_ET	HLA-DOB	6	32780540	32784825	0.054	8.6e-14	5.0346	4.79e-07
CD8_ET	HLA-DPB1	6	33043703	33054978	0.065	2.3e-16	-4.3267	1.51e-05
CD8_ET	HLA-DQA1	6	32595956	32614839	0.58	1.3e-185	10.8072	3.18e-27
CD8_ET	HLA-DQA2	6	32709119	32714992	0.92	0	20.342	5.46e-92
CD8_ET	HLA-DQB1	6	32627244	32636160	0.16	2.6e-38	-9.8037	1.09e-22
CD8_ET	HLA-DRB5	6	32485120	32498064	0.93	0	13.5371	9.45e-42
CD8_ET	HLA-G	6	29794744	29798902	0.49	1.9e-145	4.5145	6.35e-06
CD8_ET	ITPR3	6	33588142	33664351	0.03	2.8e-08	-4.7609	1.93e-06
CD8_ET	PSMB9	6	32811913	32827362	0.034	3.3e-09	8.9191	4.7e-19
CD8_ET	XXbac-BPG181B23.7	6	31362066	31363272	0.1	1.9e-25	7.0358	1.98e-12
CD8_S100B	AHI1	6	135604670	135818914	0.056	4e-14	-7.12967	1.01e-12
CD8_S100B	KDELR2	7	6485584	6523873	0.079	1.5e-19	3.99	6.61e-05
CD8_S100B	PSMD5-AS1	9	123587106	123616651	0.44	3.9e-125	4.8779	1.07e-06
CD8_S100B	PRKCQ-AS1	10	6622381	6658414	0.067	9.7e-17	-7.5522	4.28e-14
CD8_S100B	RPS26	12	56435637	56438116	0.96	0	8.06203	7.5e-16
CD8_S100B	DDX5	17	62495734	62504317	0.068	6.8e-17	5.0878	3.62e-07
CD8_S100B	HOXB-AS1	17	46620913	46628610	0.044	2.1e-11	3.9167	8.98e-05
CD8_S100B	HOXB2	17	46618256	46623441	0.14	5e-33	3.9801	6.89e-05
CD8_S100B	ORMDL3	17	38077294	38083854	0.12	6.6e-29	18.6713	8.48e-78
CD8_S100B	RPS11	19	49999622	50002946	0.043	2.6e-11	-3.99899	6.36e-05
CD8_S100B	BTN3A2	6	26365387	26378546	0.3	1.8e-78	-6.536	6.32e-11
CD8_S100B	HLA-DQB1	6	32627244	32636160	0.049	1.7e-12	-6.1542	7.55e-10
CD8_S100B	HLA-DRB5	6	32485120	32498064	0.086	4.9e-21	5.8311	5.51e-09
CD8_S100B	LST1	6	31553901	31556686	0.025	3.5e-07	6.5088	7.58e-11
DC	CD52	1	26644448	26647014	0.25	2.7e-63	-5.17918	2.23e-07
DC	FCER1G	1	161185024	161190489	0.028	1.2e-07	7.62761	2.39e-14
DC	ZNF593	1	26496362	26498551	0.019	9.5e-06	4.19629	2.71e-05
DC	TMEM156	4	38968365	39034542	0.019	1.1e-05	3.8213	0.000133
DC	AHI1	6	135604670	135818914	0.02	5.6e-06	-5.80263	6.53e-09
DC	KDELR2	7	6485584	6523873	0.048	3.4e-12	3.83966	0.000123
DC	PSMD5-AS1	9	123587106	123616651	0.13	8.5e-31	4.9054	9.32e-07
DC	TMEM258	11	61535973	61560274	0.02	4.9e-06	-7.15272	8.51e-13
DC	CTSH	15	79213400	79241916	0.03	3e-08	-3.7792	0.000157
DC	DDX5	17	62495734	62504317	0.02	5.8e-06	4.7121	2.45e-06
DC	BTN3A2	6	26365387	26378546	0.037	1.1e-09	-5.669	1.43e-08
DC	HLA-DQA1	6	32595956	32614839	0.067	2e-16	-24.639	4.82e-134
DC	HLA-DQA2	6	32709119	32714992	0.97	0	20.473	3.76e-93
DC	HLA-DQB1	6	32627244	32636160	0.1	1.1e-24	-18.089	3.87e-73
DC	HLA-DRB1	6	32546546	32557625	0.12	1.4e-29	-10.11	5.01e-24
DC	HLA-DRB5	6	32485120	32498064	0.98	0	13.686	1.23e-42
Mono_NC	CD52	1	26644448	26647014	0.87	0	-4.94509	7.61e-07
Mono_NC	FCER1G	1	161185024	161190489	0.17	4.1e-40	6.96828	3.21e-12
Mono_NC	PARK7	1	8014351	8045565	0.039	7.8e-10	-4.15165	3.3e-05
Mono_NC	SH3BGRL3	1	26605667	26608007	0.13	2.6e-30	4.94058	7.79e-07
Mono_NC	ZNF593	1	26496362	26498551	0.17	3.8e-40	4.59075	4.42e-06
Mono_NC	RAD50	5	131891711	131980313	0.032	2.4e-08	-6.3762	1.82e-10
Mono_NC	PSMD5-AS1	9	123587106	123616651	0.22	7.2e-52	4.8215	1.42e-06
Mono_NC	RPS26	12	56435637	56438116	0.87	0	11.101	1.24e-28
Mono_NC	RIN3	14	92980118	93155339	0.044	5e-11	-5.9068	3.49e-09
Mono_NC	PDXK	21	45138975	45182188	0.021	4.5e-06	4.02982	5.58e-05
Mono_NC	NCF4	22	37257030	37274057	0.031	3.3e-08	-4.15114	3.31e-05
Mono_NC	AIF1	6	31582961	31584798	0.025	6.9e-07	5.6651	1.47e-08
Mono_NC	BTN3A2	6	26365387	26378546	0.15	3.3e-36	-5.4606	4.74e-08
Mono_NC	FLOT1	6	30695486	30710510	0.049	4.3e-12	3.8653	0.000111
Mono_NC	HLA-DPA1	6	33032346	33048552	0.091	2.6e-21	3.8499	0.000118
Mono_NC	HLA-DQA2	6	32709119	32714992	0.96	0	18.9687	3.09e-80
Mono_NC	HLA-DQB1	6	32627244	32636160	0.55	4.3e-164	-26.2647	4.85e-152
Mono_NC	HLA-DRB1	6	32546546	32557625	0.13	1.6e-29	-4.1433	3.42e-05
Mono_NC	HLA-DRB5	6	32485120	32498064	0.88	0	12.6277	1.49e-36
Mono_NC	LST1	6	31553901	31556686	0.087	1.6e-20	4.0474	5.18e-05
Mono_NC	PSMB9	6	32811913	32827362	0.034	9.4e-09	7.3389	2.15e-13
NK_R	CD52	1	26644448	26647014	0.025	4.2e-07	-5.0229	5.09e-07
NK_R	FCER1G	1	161185024	161190489	0.047	5.9e-12	4.106	4.03e-05
NK_R	PSMD5-AS1	9	123587106	123616651	0.24	6.4e-59	5.0502	4.41e-07
NK_R	RPS26	12	56435637	56438116	0.93	0	10.6253	2.27e-26
NK_R	FES	15	91426925	91439006	0.066	2.3e-16	4.176	2.97e-05
NK_R	BTN3A2	6	26365387	26378546	0.17	8.3e-42	-5.439	5.36e-08
NK_R	HLA-C	6	31236526	31239907	0.16	1.3e-39	-7.104	1.21e-12
NK_R	HLA-DQB1	6	32627244	32636160	0.076	1.2e-18	-15.519	2.57e-54
NK_R	HLA-DRB1	6	32546546	32557625	0.076	1.2e-18	-5.775	7.7e-09
NK_R	HLA-DRB5	6	32485120	32498064	0.38	7.1e-103	10.548	5.2e-26
Mono_C	CD52	1	26644448	26647014	0.75	5e-297	-5.28	1.29e-07
Mono_C	FCER1A	1	159259504	159278014	0.1	2.8e-24	-5.45039	5.03e-08
Mono_C	FCER1G	1	161185024	161190489	0.18	6.3e-43	7.74225	9.77e-15
Mono_C	SH3BGRL3	1	26605667	26608007	0.15	1.7e-35	4.88908	1.01e-06
Mono_C	ZNF593	1	26496362	26498551	0.11	1.8e-25	5.21843	1.8e-07
Mono_C	KDELR2	7	6485584	6523873	0.091	5.1e-22	3.9471	7.91e-05
Mono_C	PSMD5-AS1	9	123587106	123616651	0.27	9e-68	5.09	3.64e-07
Mono_C	RPS26	12	56435637	56438116	0.89	0	9.5794	9.76e-22
Mono_C	BTN3A2	6	26365387	26378546	0.13	2.7e-32	-6.12	9.38e-10
Mono_C	C6orf48	6	31802385	31807541	0.022	2.4e-06	4.805	1.55e-06
Mono_C	HLA-A	6	29909037	29913661	0.15	6.8e-37	-4.071	4.69e-05
Mono_C	HLA-DQA1	6	32595956	32614839	0.36	1.2e-95	-5.176	2.27e-07
Mono_C	HLA-DQA2	6	32709119	32714992	0.96	0	19.013	1.33e-80
Mono_C	HLA-DQB1	6	32627244	32636160	0.61	7.5e-199	-25.092	6.03e-139
Mono_C	HLA-DRB1	6	32546546	32557625	0.12	5.7e-30	-15.187	4.3e-52
Mono_C	HLA-DRB5	6	32485120	32498064	0.98	0	13.681	1.32e-42
Mono_C	PSMB9	6	32811913	32827362	0.055	6.9e-14	5.838	5.29e-09
Mono_C	XXbac-BPG299F13.17	6	31162977	31165814	0.18	3.4e-44	-5.959	2.54e-09
CD4_NC	CD247	1	167399877	167487847	0.081	4.8e-20	-9.145	5.96e-20
CD4_NC	CD52	1	26644448	26647014	0.048	2.6e-12	4.52324	6.09e-06
CD4_NC	AC133528.2	2	242629829	242633704	0.035	1.7e-09	4.32789	1.51e-05
CD4_NC	IL18R1	2	102927989	103015218	0.093	9.2e-23	18.9389	5.45e-80
CD4_NC	LBH	2	30454397	30546596	0.035	1.8e-09	5.13828	2.77e-07
CD4_NC	LCLAT1	2	30670092	30867091	0.47	2.8e-138	-4.60935	4.04e-06
CD4_NC	RBM6	3	49977440	50137478	0.068	4.5e-17	-4.74305	2.11e-06
CD4_NC	UBE2E2	3	23244511	23633284	0.041	7.5e-11	-4.93998	7.81e-07
CD4_NC	MANBA	4	103552660	103682151	0.25	4e-64	5.519	3.41e-08
CD4_NC	CAMK4	5	110559351	110830584	0.14	5.8e-34	5.4998	3.8e-08
CD4_NC	RGS14	5	176784838	176799602	0.027	1e-07	-5.37694	7.58e-08
CD4_NC	SLC22A5	5	131705444	131731306	0.052	3.3e-13	7.29861	2.91e-13
CD4_NC	AHI1	6	135604670	135818914	0.47	3.7e-137	-6.94633	3.75e-12
CD4_NC	SESN1	6	109307640	109416022	0.18	2.3e-45	-5.93407	2.96e-09
CD4_NC	JAZF1	7	27870192	28220362	0.031	1.5e-08	9.9372	2.87e-23
CD4_NC	GLI4	8	144349603	144359101	0.029	4e-08	-4.3708	1.24e-05
CD4_NC	PSMD5-AS1	9	123587106	123616651	0.85	0	5.12726	2.94e-07
CD4_NC	C10orf32	10	104613980	104624718	0.16	6.5e-39	4.35957	1.3e-05
CD4_NC	PRKCQ-AS1	10	6622381	6658414	0.4	9e-112	-7.46285	8.47e-14
CD4_NC	CCS	11	66360292	66373490	0.047	3.3e-12	5.3579	8.42e-08
CD4_NC	DDX6	11	118620034	118661858	0.031	2.1e-08	4.5252	6.03e-06
CD4_NC	FADS1	11	61567099	61596790	0.22	1.4e-54	-7.5241	5.31e-14
CD4_NC	FADS2	11	61560452	61634826	0.44	1.2e-127	-6.5636	5.25e-11
CD4_NC	TMEM258	11	61535973	61560274	0.099	2.6e-24	-7.2879	3.15e-13
CD4_NC	ARL6IP4	12	123464607	123467456	0.059	8.8e-15	4.88364	1.04e-06
CD4_NC	MPHOSPH9	12	123636867	123728561	0.077	6e-19	-6.29136	3.15e-10
CD4_NC	RPS26	12	56435637	56438116	0.97	0	8.55823	1.15e-17
CD4_NC	GPR18	13	99906968	99913998	0.023	1.3e-06	-8.40637	4.23e-17
CD4_NC	CLUAP1	16	3550924	3589048	0.059	6.9e-15	-4.34196	1.41e-05
CD4_NC	DDX5	17	62495734	62504317	0.072	5.4e-18	5.15	2.63e-07
CD4_NC	GSDMB	17	38060848	38076107	0.028	7.3e-08	11.8	6.39e-32
CD4_NC	HOXB4	17	46652875	46657473	0.19	9e-47	4.53	6.03e-06
CD4_NC	ORMDL3	17	38077294	38083854	0.43	1e-122	12.3	8.19e-35
CD4_NC	SMARCE1	17	38781214	38804760	0.026	2.2e-07	-5.28	1.27e-07
CD4_NC	CD226	18	67498394	67629039	0.026	2.2e-07	4.5681	4.92e-06
CD4_NC	POLI	18	51795774	51847636	0.024	5.5e-07	6.2855	3.27e-10
CD4_NC	MEI1	22	42095503	42195460	0.04	1.7e-10	5.63363	1.76e-08
CD4_NC	TEF	22	41763337	41795330	0.037	9.3e-10	4.37551	1.21e-05
CD4_NC	BTN2A1	6	26458150	26476849	0.23	4.2e-58	4.2655	1.99e-05
CD4_NC	BTN2A2	6	26383324	26395102	0.052	3.1e-13	5.5322	3.16e-08
CD4_NC	BTN3A2	6	26365387	26378546	0.79	0	-6.013	1.82e-09
CD4_NC	C6orf48	6	31802385	31807541	0.048	2.8e-12	4.7519	2.02e-06
CD4_NC	CLIC1	6	31698358	31707540	0.027	1.6e-07	4.5759	4.74e-06
CD4_NC	HLA-DMA	6	32916390	32936871	0.056	3.7e-14	5.082	3.73e-07
CD4_NC	HLA-DPB1	6	33043703	33054978	0.038	4.2e-10	-4.741	2.13e-06
CD4_NC	HLA-DQA1	6	32595956	32614839	0.037	9e-10	8.9576	3.32e-19
CD4_NC	HLA-DQA2	6	32709119	32714992	0.38	2.9e-105	16.728	8.19e-63
CD4_NC	HLA-DRB5	6	32485120	32498064	0.44	2.7e-124	15.6605	2.82e-55
CD4_NC	HLA-G	6	29794744	29798902	0.47	2.1e-136	4.4728	7.72e-06
CD4_NC	MICB	6	31462658	31478901	0.071	9.6e-18	6.0247	1.69e-09
CD4_NC	NCR3	6	31556672	31560762	0.032	8.3e-09	4.3381	1.44e-05
CD4_NC	PSMB9	6	32811913	32827362	0.037	8.6e-10	8.8151	1.2e-18
B_IN	AP1S3	2	224616403	224702744	0.09	3.5e-22	5.55171	2.83e-08
B_IN	RBM6	3	49977440	50137478	0.024	6.9e-07	-4.5235	6.08e-06
B_IN	AHI1	6	135604670	135818914	0.32	6.5e-83	-7.1576	8.21e-13
B_IN	KDELR2	7	6485584	6523873	0.087	2.2e-21	3.9812	6.86e-05
B_IN	PSMD5-AS1	9	123587106	123616651	0.6	1.1e-195	5.19759	2.02e-07
B_IN	TMEM258	11	61535973	61560274	0.025	3e-07	-6.85614	7.07e-12
B_IN	IFNG-AS1	12	68383225	68628466	0.1	3.4e-25	-4.51	6.39e-06
B_IN	HOXB2	17	46618256	46623441	0.094	5.2e-23	3.9799	6.89e-05
B_IN	MILR1	17	62461569	62464760	0.13	2.1e-32	-4.92367	8.49e-07
B_IN	ORMDL3	17	38077294	38083854	0.22	3e-56	21.9533	8.05e-107
B_IN	BTN3A2	6	26365387	26378546	0.26	3.1e-66	-5.841	5.18e-09
B_IN	HLA-DQA1	6	32595956	32614839	0.25	3.1e-63	20.667	6.86e-95
B_IN	HLA-DQA2	6	32709119	32714992	0.99	0	20.667	6.93e-95
B_IN	HLA-DQB1	6	32627244	32636160	0.41	6.3e-114	-21.879	4.12e-106
B_IN	HLA-DQB2	6	32723875	32731311	0.7	1.8e-256	25.782	1.42e-146
B_IN	HLA-DRB5	6	32485120	32498064	0.99	0	15.367	2.74e-53
B_IN	LST1	6	31553901	31556686	0.089	8.8e-22	4.292	1.77e-05
NK	CD52	1	26644448	26647014	0.15	9.3e-36	-5.22523	1.74e-07
NK	ENO1	1	8921061	8939308	0.048	1.9e-12	-4.14292	3.43e-05
NK	TNFRSF14	1	2487078	2496821	0.03	3.5e-08	-5.32334	1.02e-07
NK	DARS	2	136664247	136743670	0.022	1.9e-06	4.19863	2.69e-05
NK	IL18R1	2	102927989	103015218	0.047	4.6e-12	7.39444	1.42e-13
NK	IL18RAP	2	103035149	103069025	0.031	1.4e-08	12.8394	9.87e-38
NK	C5orf56	5	131746328	131811736	0.051	4.7e-13	6.02594	1.68e-09
NK	AHI1	6	135604670	135818914	0.23	5.8e-57	-6.8966	5.33e-12
NK	ERI1	8	8859657	8974256	0.05	8.9e-13	4.17	3.05e-05
NK	ERMP1	9	5765076	5833117	0.066	1.7e-16	-4.6724	2.98e-06
NK	PSMD5-AS1	9	123587106	123616651	0.7	1.6e-260	5.1512	2.59e-07
NK	HHEX	10	94447945	94455403	0.14	3.1e-34	6.95069	3.64e-12
NK	CCS	11	66360292	66373490	0.058	1.2e-14	4.9632	6.93e-07
NK	DDX6	11	118620034	118661858	0.023	1.2e-06	6.7383	1.6e-11
NK	FADS1	11	61567099	61596790	0.025	4.5e-07	-8.0565	7.85e-16
NK	FADS2	11	61560452	61634826	0.29	1.3e-75	-6.9036	5.07e-12
NK	MPZL3	11	118097409	118123065	0.02	6e-06	-4.1721	3.02e-05
NK	MPHOSPH9	12	123636867	123728561	0.04	1.2e-10	-6.32734	2.49e-10
NK	RPS26	12	56435637	56438116	0.96	0	10.307	6.55e-25
NK	PCNX	14	71374122	71582099	0.075	1.5e-18	4.4342	9.24e-06
NK	GCHFR	15	41056218	41059906	0.28	4.8e-71	4.24382	2.2e-05
NK	RMDN3	15	41028082	41048049	0.077	4.8e-19	4.45623	8.34e-06
NK	DDX5	17	62495734	62504317	0.088	1e-21	5.04802	4.46e-07
NK	GNGT2	17	47280153	47287936	0.034	3.4e-09	6.42283	1.34e-10
NK	GSDMB	17	38060848	38076107	0.022	1.9e-06	16.9109	3.74e-64
NK	HOXB-AS1	17	46620913	46628610	0.054	1.1e-13	4.40563	1.05e-05
NK	ORMDL3	17	38077294	38083854	0.36	5.6e-99	20.0475	2.12e-89
NK	MEI1	22	42095503	42195460	0.021	3.3e-06	5.3423	9.18e-08
NK	BTN3A2	6	26365387	26378546	0.73	2.2e-280	-6.3923	1.63e-10
NK	HLA-A	6	29909037	29913661	0.23	4.5e-59	-4.4725	7.73e-06
NK	HLA-C	6	31236526	31239907	0.28	1.8e-71	-6.4833	8.97e-11
NK	HLA-DQA1	6	32595956	32614839	0.37	2e-99	14.1319	2.42e-45
NK	HLA-DQA2	6	32709119	32714992	0.82	0	16.8346	1.36e-63
NK	HLA-DQB1	6	32627244	32636160	0.11	1.3e-27	-10.7963	3.58e-27
NK	HLA-DRB1	6	32546546	32557625	0.037	8.4e-10	-12.995	1.31e-38
NK	HLA-DRB5	6	32485120	32498064	0.45	2.1e-128	10.3159	5.97e-25
NK	MICB	6	31462658	31478901	0.076	7.4e-19	4.2294	2.34e-05
NK	NCR3	6	31556672	31560762	0.22	5e-55	5.6816	1.33e-08
NK	PSMB9	6	32811913	32827362	0.08	8.5e-20	7.0593	1.67e-12
Plasma	PSMD5-AS1	9	123587106	123616651	0.1	2e-20	5.0431	4.58e-07
Plasma	IFNG-AS1	12	68383225	68628466	0.25	2.7e-52	-3.9869	6.69e-05
Plasma	RPS26	12	56435637	56438116	0.69	6e-205	11.3948	4.44e-30
Plasma	SULF2	20	46285092	46415360	0.52	1.1e-128	3.5564	0.000376
Plasma	BTN3A2	6	26365387	26378546	0.17	3.3e-35	-6.46	1.05e-10
Plasma	HLA-B	6	31321649	31324965	0.29	2.5e-61	5.114	3.16e-07
Plasma	HLA-C	6	31236526	31239907	0.18	9.9e-36	-4.641	3.46e-06
Plasma	HLA-DQA1	6	32595956	32614839	0.1	1.4e-20	8.887	6.3e-19
Plasma	HLA-DQA2	6	32709119	32714992	0.87	0	16.671	2.12e-62
Plasma	HLA-DQB1	6	32627244	32636160	0.18	2.6e-36	-14.037	9.22e-45
Plasma	HLA-DRB5	6	32485120	32498064	0.85	0	13.265	3.68e-40

## Sheet: Table S6
ct	subtype	ID	CHR	P0	P1	MODELCV.R2	MODELCV.PV	TWAS.Z	TWAS.P
Microglia	Microglia	PICALM	11	85668727	85780924	0.18	5.3e-20	-12.8773	6.04e-38
Oligodendrocytes	Oligodendrocytes	CR1	1	207669492	207813992	0.4	5.3e-49	11.742	7.76e-32
Excitatory_Neurons	Excitatory_Neurons	CEACAM19	19	45165545	45187631	0.051	1.6e-06	9.71	2.84e-22
Excitatory_Neurons	Excitatory_Neurons	APOC4	19	45445495	45452820	0.23	9.5e-26	8.06	7.56e-16
Microglia	Microglia	EPHA1-AS1	7	143104906	143220542	0.93	2.2e-243	-8.04123	8.89e-16
Microglia	Microglia	PTK2B	8	27168999	27316903	0.089	2.2e-10	7.2932	3.03e-13
Microglia	Microglia	RABEP1	17	5185558	5289129	0.055	6.2e-07	6.96967	3.18e-12
OPCs	OPCs	LRRC37A	17	44370099	44415160	0.26	2.5e-29	-6.10551	1.02e-09
Microglia	Microglia	FERMT2	14	53323986	53419153	0.091	1.2e-10	6.01997	1.74e-09
Excitatory_Neurons	Excitatory_Neurons	LRRC37A2	17	44588877	44633016	0.83	8.2e-164	-5.95236	2.64e-09
Inhibitory_Neurons	Inhibitory_Neurons	SCIMP	17	5112256	5138155	0.086	4.6e-10	5.94515	2.76e-09
Astrocyte	Astrocyte	HLA-DRA	6	32407619	32412823	0.31	1.5e-35	5.92235	3.17e-09
Inhibitory_Neurons	Inhibitory_Neurons	USP6NL	10	11495945	11653753	0.072	1.2e-08	-5.90214	3.59e-09
Inhibitory_Neurons	Inhibitory_Neurons	LRRC37A	17	44370099	44415160	0.67	3.1e-104	-5.87033	4.35e-09
Inhibitory_Neurons	Inhibitory_Neurons	LRRC37A2	17	44588877	44633016	0.84	1.9e-169	-5.7945	6.85e-09
Excitatory_Neurons	Excitatory_Neurons	KANSL1-AS1	17	44270942	44274089	0.53	9e-71	-5.74771	9.05e-09
Microglia	Microglia	RASGEF1C	5	179527795	179636153	0.53	2.3e-72	-5.7162	1.09e-08
Oligodendrocytes	Oligodendrocytes	EPHX2	8	27348296	27403081	0.06	1.7e-07	5.6936	1.24e-08
OPCs	OPCs	MAPT-AS1	17	43921017	43972966	0.078	2.8e-09	5.65483	1.56e-08
Excitatory_Neurons	Excitatory_Neurons	LRRC37A	17	44370099	44415160	0.73	4.9e-123	-5.5857	2.33e-08
Excitatory_Neurons	Excitatory_Neurons	BTNL2	6	32361740	32374905	0.16	1.7e-18	5.5356	3.1e-08
OPCs	OPCs	ARL17B	17	44352150	44439130	0.94	7.9e-267	-5.5118	3.55e-08
Microglia	Microglia	ARL17B	17	44352150	44439130	0.95	8.5e-272	-5.50542	3.68e-08
Oligodendrocytes	Oligodendrocytes	ARL17B	17	44352150	44439130	0.96	5.1e-304	-5.50175	3.76e-08
Inhibitory_Neurons	Inhibitory_Neurons	PLEKHM1	17	43513266	43568115	0.063	8.5e-08	5.493	3.95e-08
Inhibitory_Neurons	Inhibitory_Neurons	KANSL1-AS1	17	44270942	44274089	0.36	1e-42	-5.48754	4.08e-08
Astrocyte	Astrocyte	MAPT	17	43971748	44105700	0.11	8.1e-13	-5.48322	4.18e-08
Astrocyte	Astrocyte	SNX31	8	101585116	101675643	0.35	4.8e-41	5.43507	5.48e-08
Inhibitory_Neurons	Inhibitory_Neurons	ARL17B	17	44352150	44439130	0.96	0	-5.38256	7.34e-08
Microglia	Microglia	JAZF1	7	27870192	28220362	0.51	8.7e-68	-5.38227	7.36e-08
Excitatory_Neurons	Excitatory_Neurons	ARL17B	17	44352150	44439130	0.96	2.2e-299	-5.37169	7.8e-08
Astrocyte	Astrocyte	EGFR	7	55086714	55324313	0.074	7.8e-09	5.36613	8.04e-08
Oligodendrocytes	Oligodendrocytes	KANSL1-AS1	17	44270942	44274089	0.53	5.5e-72	-5.31188	1.09e-07
Astrocyte	Astrocyte	ARL17B	17	44352150	44439130	0.97	0	-5.3005	1.15e-07
Oligodendrocytes	Oligodendrocytes	MAPT-AS1	17	43921017	43972966	0.11	4.2e-13	5.29575	1.19e-07
Oligodendrocytes	Oligodendrocytes	TAP2	6	32789610	32806557	0.06	1.9e-07	-5.18616	2.15e-07
Microglia	Microglia	TP53INP1	8	95938200	95961639	0.065	5.3e-08	-5.1703	2.34e-07
Microglia	Microglia	SCIMP	17	5112256	5138155	0.1	8.9e-12	5.12265	3.01e-07
Microglia	Microglia	KANSL1-AS1	17	44270942	44274089	0.2	1.8e-22	-5.10039	3.39e-07
OPCs	OPCs	LRRC37A2	17	44588877	44633016	0.45	2.4e-56	-5.05953	4.2e-07
Inhibitory_Neurons	Inhibitory_Neurons	ZNF155	19	44472014	44502477	0.068	2.7e-08	-5.05637	4.27e-07
Excitatory_Neurons	Excitatory_Neurons	DCLK3	3	36753913	36781352	0.066	4.7e-08	-5.04356	4.57e-07
Oligodendrocytes	Oligodendrocytes	ZNF232	17	5008836	5026411	0.073	9.4e-09	-5.04173	4.61e-07
Oligodendrocytes	Oligodendrocytes	KCTD13	16	29916333	29938356	0.14	1.5e-15	-4.99715	5.82e-07
Inhibitory_Neurons	Inhibitory_Neurons	ZKSCAN3	6	28317691	28336947	0.053	9.7e-07	-4.9799	6.36e-07
Excitatory_Neurons	Excitatory_Neurons	ZKSCAN1	7	99613204	99639312	0.048	3.3e-06	-4.96811	6.76e-07
Excitatory_Neurons	Excitatory_Neurons	SCIMP	17	5112256	5138155	0.079	2e-09	4.933	8.1e-07
Microglia	Microglia	LRRC37A	17	44370099	44415160	0.27	3.9e-31	-4.92795	8.31e-07
Excitatory_Neurons	Excitatory_Neurons	CRHR1	17	43699267	43913194	0.12	4.6e-14	-4.92334	8.51e-07
Microglia	Microglia	USP6NL	10	11495945	11653753	0.098	2.6e-11	4.85873	1.18e-06
Excitatory_Neurons	Excitatory_Neurons	CTSH	15	79213400	79241916	0.075	5.1e-09	-4.8283	1.38e-06
Astrocyte	Astrocyte	KANSL1-AS1	17	44270942	44274089	0.47	5e-61	-4.77191	1.82e-06
Excitatory_Neurons	Excitatory_Neurons	ZKSCAN3	6	28317691	28336947	0.049	2.3e-06	-4.7064	2.52e-06
Excitatory_Neurons	Excitatory_Neurons	TAP2	6	32789610	32806557	0.41	3.7e-51	-4.6984	2.62e-06
Oligodendrocytes	Oligodendrocytes	SLC4A8	12	51785101	51902980	0.24	1.1e-26	-4.69276	2.7e-06
Astrocyte	Astrocyte	LRRC37A	17	44370099	44415160	0.47	1.7e-60	-4.68876	2.75e-06
Inhibitory_Neurons	Inhibitory_Neurons	TAP2	6	32789610	32806557	0.26	3.8e-29	-4.6109	4.01e-06
Oligodendrocytes	Oligodendrocytes	CCNT2-AS1	2	135493034	135676280	0.086	3.9e-10	-4.60428	4.14e-06
Excitatory_Neurons	Excitatory_Neurons	MTUS1	8	17501304	17658426	0.16	3.4e-18	-4.59759	4.27e-06
Astrocyte	Astrocyte	HLA-DRB1	6	32546546	32557625	0.1	1.4e-11	4.59573	4.31e-06
Excitatory_Neurons	Excitatory_Neurons	HLA-DOB	6	32780540	32784825	0.78	8.4e-141	-4.5825	4.59e-06
OPCs	OPCs	KANSL1	17	44107282	44302733	0.82	3.9e-160	-4.57187	4.83e-06
Astrocyte	Astrocyte	LACTB	15	63413999	63434260	0.065	6.5e-08	4.5557	5.22e-06
OPCs	OPCs	KANSL1-AS1	17	44270942	44274089	0.17	9.8e-19	-4.52146	6.14e-06
Oligodendrocytes	Oligodendrocytes	GALNT6	12	51745031	51786651	0.25	1.9e-28	-4.44679	8.72e-06
Astrocyte	Astrocyte	KANSL1	17	44107282	44302733	0.82	1.9e-159	-4.35489	1.33e-05
Inhibitory_Neurons	Inhibitory_Neurons	KANSL1	17	44107282	44302733	0.81	3.8e-154	-4.35157	1.35e-05
Oligodendrocytes	Oligodendrocytes	HLA-DOB	6	32780540	32784825	0.18	1.2e-20	-4.31612	1.59e-05
Excitatory_Neurons	Excitatory_Neurons	CD55	1	207494853	207534311	0.15	5.5e-17	-4.30704	1.65e-05
Microglia	Microglia	PLEKHA1	10	124134212	124191867	0.055	6.3e-07	4.28546	1.82e-05
Inhibitory_Neurons	Inhibitory_Neurons	SYTL2	11	85405267	85522184	0.067	3.4e-08	-4.25783	2.06e-05
Astrocyte	Astrocyte	HS3ST5	6	114376750	114664209	0.047	4e-06	-4.248	2.16e-05
Oligodendrocytes	Oligodendrocytes	KANSL1	17	44107282	44302733	0.77	1.1e-138	-4.23432	2.29e-05
OPCs	OPCs	PPM1E	17	56833230	57058983	0.058	3.1e-07	4.1945	2.73e-05
Inhibitory_Neurons	Inhibitory_Neurons	HLA-DOB	6	32780540	32784825	0.72	2.3e-120	-4.1906	2.78e-05
OPCs	OPCs	CCNT2-AS1	2	135493034	135676280	0.07	1.9e-08	-4.16244	3.15e-05
Astrocyte	Astrocyte	HLA-DOB	6	32780540	32784825	0.41	2.6e-50	-4.15391	3.27e-05
OPCs	OPCs	KNOP1	16	19714902	19729557	0.36	1.3e-42	-4.14738	3.36e-05
Astrocyte	Astrocyte	LLGL1	17	18128901	18148189	0.33	4.5e-39	-4.13744	3.51e-05
Microglia	Microglia	KNOP1	16	19714902	19729557	0.17	1.9e-19	-4.04085	5.33e-05
OPCs	OPCs	DNA2	10	70173821	70231879	0.11	1.1e-12	-3.9776	6.96e-05
Microglia	Mic.8	BIN1	2	127805603	127864931	0.06	9.7e-07	15.1428	8.46e-52
Microglia	Mic.8	PICALM	11	85668727	85780924	0.055	2.4e-06	-13.6802	1.33e-42
Microglia	Mic.4	PICALM	11	85668727	85780924	0.072	6.6e-08	-13.1474	1.76e-39
Microglia	Mic.7	PICALM	11	85668727	85780924	0.095	2.3e-09	-13.1	6.35e-39
Microglia	Mic.3	PICALM	11	85668727	85780924	0.091	1.4e-09	-12.9697	1.82e-38
Microglia	Mic.5	PICALM	11	85668727	85780924	0.086	5.4e-10	-12.6941	6.37e-37
Microglia	Mic.2	PICALM	11	85668727	85780924	0.12	7.2e-12	-12.161	5.01e-34
Oligodendrocytes	Oli.6	CR1	1	207669492	207813992	0.26	5.6e-30	11.6435	2.48e-31
Oligodendrocytes	Oli.2	CR1	1	207669492	207813992	0.33	2.8e-38	11.5571	6.79e-31
Oligodendrocytes	Oli.3	CR1	1	207669492	207813992	0.31	1.5e-35	11.4583	2.14e-30
Oligodendrocytes	Oli.4	CR1	1	207669492	207813992	0.37	1.2e-42	11.3021	1.28e-29
Microglia	Mic.15	PPP1R37	19	45594654	45651335	0.27	3.1e-16	8.71561	2.89e-18
Microglia	Mic.8	EPHA1-AS1	7	143104906	143220542	0.65	1.4e-86	-8.3364	7.66e-17
Microglia	Mic.9	EPHA1-AS1	7	143104906	143220542	0.34	2e-33	-8.294	1.09e-16
Microglia	Mic.3	EPHA1-AS1	7	143104906	143220542	0.72	2.9e-105	-8.24259	1.69e-16
Microglia	Mic.4	EPHA1-AS1	7	143104906	143220542	0.58	7.9e-74	-8.23977	1.73e-16
Microglia	Mic.5	EPHA1-AS1	7	143104906	143220542	0.51	9.9e-67	-8.20264	2.35e-16
Microglia	Mic.6	EPHA1-AS1	7	143104906	143220542	0.66	2.2e-79	-8.18	2.84e-16
Microglia	Mic.10	EPHA1-AS1	7	143104906	143220542	0.5	2.2e-47	-8.17381	2.99e-16
Microglia	Mic.2	EPHA1-AS1	7	143104906	143220542	0.78	1.3e-117	-8.055	7.94e-16
Microglia	Mic.7	EPHA1-AS1	7	143104906	143220542	0.86	3.1e-153	-7.96453	1.66e-15
Microglia	Mic.12	EPHA1-AS1	7	143104906	143220542	0.48	1.2e-58	-7.93387	2.12e-15
Oligodendrocytes	Oli.2	APH1B	15	63568217	63601325	0.048	3.1e-06	7.8588	3.88e-15
Oligodendrocytes	Oli.9	PTK2B	8	27168999	27316903	0.12	7.1e-13	-7.7883	6.79e-15
Microglia	Mic.8	PTK2B	8	27168999	27316903	0.059	1e-06	7.5573	4.11e-14
Microglia	Mic.13	EPHA1-AS1	7	143104906	143220542	0.57	3.4e-60	-7.51474	5.7e-14
Microglia	Mic.7	PTK2B	8	27168999	27316903	0.13	1.6e-12	7.12708	1.03e-12
Microglia	Mic.7	RASGEF1C	5	179527795	179636153	0.13	4.3e-12	-6.90887	4.89e-12
Microglia	Mic.4	RASGEF1C	5	179527795	179636153	0.18	1.4e-18	-6.8403	7.9e-12
Excitatory_Neurons	cux2+_Exc.5	SCIMP	17	5112256	5138155	0.07	2.3e-08	6.74163	1.57e-11
Microglia	Mic.2	SLC24A4	14	92788925	92962596	0.064	8.4e-07	-6.6532	2.87e-11
Astrocyte	Ast.5	HLA-DRA	6	32407619	32412823	0.17	1e-17	6.55679	5.5e-11
Microglia	Mic.3	RASGEF1C	5	179527795	179636153	0.29	3.8e-30	-6.50769	7.63e-11
Excitatory_Neurons	cux2+_Exc.5	ZNF285	19	44886459	44905774	0.063	1e-07	-6.5	7.81e-11
Microglia	Mic.9	PVR	19	45147098	45166850	0.064	1.1e-06	-6.48	9.17e-11
Inhibitory_Neurons	Inh.6	ZKSCAN1	7	99613204	99639312	0.057	3.4e-07	-6.43603	1.23e-10
Microglia	Mic.13	MS4A6A	11	59939081	59952139	0.073	4.8e-07	6.4161	1.4e-10
Microglia	Mic.5	USP6NL	10	11495945	11653753	0.05	2.5e-06	6.36283	1.98e-10
Excitatory_Neurons	cux2+_Exc.2	SCIMP	17	5112256	5138155	0.059	2.5e-07	6.3276	2.49e-10
Inhibitory_Neurons	Inh.10	USP6NL	10	11495945	11653753	0.12	6.1e-14	-6.22621	4.78e-10
OPCs	OPC.2	LRRC37A	17	44370099	44415160	0.23	2.8e-26	-6.20744	5.39e-10
Excitatory_Neurons	cux2+_Exc.4	SCIMP	17	5112256	5138155	0.077	4e-09	6.16209	7.18e-10
Excitatory_Neurons	cux2+_Exc.6	BTNL2	6	32361740	32374905	0.093	9.2e-11	6.122	9.24e-10
Inhibitory_Neurons	Inh.5	LRRC37A2	17	44588877	44633016	0.43	4.7e-53	-6.0855	1.16e-09
Inhibitory_Neurons	Inh.2	LRRC37A	17	44370099	44415160	0.35	2.9e-41	-6.07587	1.23e-09
Excitatory_Neurons	cux2-_Exc.14	LRRC37A2	17	44588877	44633016	0.65	1.3e-97	-6.0702	1.28e-09
Astrocyte	Ast.4	EGFR	7	55086714	55324313	0.063	9.5e-08	6.06618	1.31e-09
Microglia	Mic.7	HLA-DRB1	6	32546546	32557625	0.15	1.3e-14	6.0627	1.34e-09
Excitatory_Neurons	cux2-_Exc.8	LRRC37A2	17	44588877	44633016	0.78	2.7e-139	-6.04716	1.47e-09
Inhibitory_Neurons	Inh.7	LRRC37A2	17	44588877	44633016	0.52	1.1e-69	-6.03941	1.55e-09
Excitatory_Neurons	cux2+_Exc.7	LRRC37A2	17	44588877	44633016	0.72	4.5e-117	-6.02078	1.74e-09
Inhibitory_Neurons	Inh.12	LRRC37A2	17	44588877	44633016	0.68	6.8e-107	-6.02028	1.74e-09
Microglia	Mic.5	JAZF1	7	27870192	28220362	0.37	6.7e-44	-6.00246	1.94e-09
Excitatory_Neurons	cux2-_Exc.15	LRRC37A2	17	44588877	44633016	0.66	1.5e-99	-6.00027	1.97e-09
Microglia	Mic.5	RASGEF1C	5	179527795	179636153	0.16	4.3e-18	-5.98718	2.14e-09
Excitatory_Neurons	cux2+_Exc.6	LRRC37A2	17	44588877	44633016	0.81	1.2e-153	-5.9732	2.33e-09
Excitatory_Neurons	cux2-_Exc.12	LRRC37A	17	44370099	44415160	0.44	8.3e-54	-5.97317	2.33e-09
Excitatory_Neurons	cux2-_Exc.10	LRRC37A2	17	44588877	44633016	0.79	1e-145	-5.96979	2.38e-09
Excitatory_Neurons	cux2+_Exc.4	LRRC37A2	17	44588877	44633016	0.84	6.8e-170	-5.96681	2.42e-09
Excitatory_Neurons	cux2+_Exc.2	LRRC37A2	17	44588877	44633016	0.79	1.7e-145	-5.9601	2.52e-09
Excitatory_Neurons	cux2-_Exc.11	LRRC37A2	17	44588877	44633016	0.68	4.1e-108	-5.95943	2.53e-09
Inhibitory_Neurons	Inh.10	LRRC37A2	17	44588877	44633016	0.7	2.5e-113	-5.95891	2.54e-09
Astrocyte	Ast.1	EGFR	7	55086714	55324313	0.14	3.2e-15	5.9478	2.72e-09
Excitatory_Neurons	cux2+_Exc.5	LRRC37A2	17	44588877	44633016	0.87	1.5e-186	-5.94745	2.72e-09
Inhibitory_Neurons	Inh.16	LRRC37A2	17	44588877	44633016	0.81	3.6e-153	-5.94371	2.79e-09
Excitatory_Neurons	cux2-_Exc.14	LRRC37A	17	44370099	44415160	0.43	4.7e-52	-5.9237	3.15e-09
Excitatory_Neurons	cux2+_Exc.3	LRRC37A2	17	44588877	44633016	0.77	1.2e-133	-5.922	3.18e-09
Inhibitory_Neurons	Inh.11	LRRC37A2	17	44588877	44633016	0.51	1.9e-67	-5.91937	3.23e-09
Inhibitory_Neurons	Inh.6	LRRC37A	17	44370099	44415160	0.47	4.3e-60	-5.91758	3.27e-09
Excitatory_Neurons	cux2-_Exc.9	LRRC37A	17	44370099	44415160	0.67	3.3e-104	-5.91217	3.38e-09
Microglia	Mic.10	BIN1	2	127805603	127864931	0.069	2.2e-06	5.90491	3.53e-09
Microglia	Mic.3	CASS4	20	54987168	55034396	0.085	5e-09	-5.8966	3.71e-09
Inhibitory_Neurons	Inh.15	LRRC37A2	17	44588877	44633016	0.83	2.1e-164	-5.89247	3.8e-09
Inhibitory_Neurons	Inh.4	LRRC37A2	17	44588877	44633016	0.32	7.4e-36	-5.8844	3.99e-09
Inhibitory_Neurons	Inh.10	LRRC37A	17	44370099	44415160	0.48	4.9e-62	-5.87801	4.15e-09
Astrocyte	Ast.3	HLA-DRA	6	32407619	32412823	0.17	2.9e-19	5.8719	4.31e-09
Excitatory_Neurons	cux2-_Exc.9	LRRC37A2	17	44588877	44633016	0.78	1.8e-141	-5.8576	4.7e-09
Microglia	Mic.1	EPHA1-AS1	7	143104906	143220542	0.47	1.1e-27	-5.85673	4.72e-09
Inhibitory_Neurons	Inh.9	LRRC37A2	17	44588877	44633016	0.42	4.2e-52	-5.84969	4.93e-09
Excitatory_Neurons	cux2-_Exc.13	LRRC37A2	17	44588877	44633016	0.65	5.3e-97	-5.8416	5.17e-09
Excitatory_Neurons	cux2-_Exc.8	LRRC37A	17	44370099	44415160	0.59	1.7e-82	-5.81992	5.89e-09
Microglia	Mic.6	ARL17B	17	44352150	44439130	0.69	1.7e-85	-5.8175	5.97e-09
Excitatory_Neurons	cux2+_Exc.6	LRRC37A	17	44370099	44415160	0.65	1.2e-97	-5.81618	6.02e-09
Inhibitory_Neurons	Inh.3	LRRC37A2	17	44588877	44633016	0.56	1.7e-76	-5.81328	6.13e-09
Microglia	Mic.10	ARL17B	17	44352150	44439130	0.67	3.4e-75	-5.81178	6.18e-09
Inhibitory_Neurons	Inh.10	CD55	1	207494853	207534311	0.073	9.6e-09	-5.77959	7.49e-09
Microglia	Mic.8	ARL17B	17	44352150	44439130	0.55	8.7e-67	-5.7611	8.36e-09
Inhibitory_Neurons	Inh.15	LRRC37A	17	44370099	44415160	0.67	2.2e-103	-5.75721	8.55e-09
Inhibitory_Neurons	Inh.2	LRRC37A2	17	44588877	44633016	0.62	4.1e-91	-5.75601	8.61e-09
Microglia	Mic.7	ARL17B	17	44352150	44439130	0.85	1.4e-146	-5.73212	9.92e-09
Oligodendrocytes	Oli.8	ARL17B	17	44352150	44439130	0.98	3.5e-109	-5.7092	1.14e-08
Inhibitory_Neurons	Inh.9	ARL17B	17	44352150	44439130	0.86	5.3e-184	-5.70059	1.19e-08
Inhibitory_Neurons	Inh.8	LRRC37A	17	44370099	44415160	0.34	5.6e-39	-5.68971	1.27e-08
Oligodendrocytes	Oli.4	ARL17B	17	44352150	44439130	0.5	3.9e-63	-5.689	1.28e-08
Excitatory_Neurons	cux2+_Exc.1	ARL17B	17	44352150	44439130	0.8	2e-84	-5.68235	1.33e-08
Oligodendrocytes	Oli.7	ARL17B	17	44352150	44439130	0.87	6.8e-120	-5.67386	1.4e-08
Inhibitory_Neurons	Inh.8	LRRC37A2	17	44588877	44633016	0.55	1.5e-73	-5.67357	1.4e-08
Excitatory_Neurons	cux2-_Exc.12	LRRC37A2	17	44588877	44633016	0.65	1.4e-95	-5.67051	1.42e-08
Inhibitory_Neurons	Inh.13	LRRC37A2	17	44588877	44633016	0.65	2.1e-96	-5.66696	1.45e-08
Excitatory_Neurons	cux2-_Exc.9	BTNL2	6	32361740	32374905	0.089	2.4e-10	5.66165	1.5e-08
Astrocyte	Ast.5	PPP1R37	19	45594654	45651335	0.051	3.4e-06	-5.63383	1.76e-08
Astrocyte	Ast.1	HLA-DRA	6	32407619	32412823	0.31	1.6e-35	5.6316	1.79e-08
Excitatory_Neurons	cux2+_Exc.4	LRRC37A	17	44370099	44415160	0.74	1.3e-125	-5.63113	1.79e-08
Excitatory_Neurons	cux2-_Exc.9	KANSL1-AS1	17	44270942	44274089	0.43	5.1e-53	-5.63028	1.8e-08
Inhibitory_Neurons	Inh.6	LRRC37A2	17	44588877	44633016	0.7	1.6e-112	-5.61562	1.96e-08
Microglia	Mic.9	ARL17B	17	44352150	44439130	0.4	9.7e-40	-5.60964	2.03e-08
Microglia	Mic.4	ARL17B	17	44352150	44439130	0.61	3.8e-80	-5.60681	2.06e-08
Excitatory_Neurons	cux2+_Exc.7	KANSL1-AS1	17	44270942	44274089	0.28	2.9e-32	-5.60607	2.07e-08
Microglia	Mic.3	ARL17B	17	44352150	44439130	0.72	6.3e-106	-5.60436	2.09e-08
Microglia	Mic.1	ARL17B	17	44352150	44439130	0.71	6e-51	-5.60247	2.11e-08
Astrocyte	Ast.2	ARL17B	17	44352150	44439130	0.78	2.8e-96	-5.60173	2.12e-08
Oligodendrocytes	Oli.3	TAP2	6	32789610	32806557	0.057	3.6e-07	-5.5963	2.19e-08
Excitatory_Neurons	cux2+_Exc.2	LRRC37A	17	44370099	44415160	0.66	1.3e-99	-5.577	2.45e-08
OPCs	OPC.2	ARL17B	17	44352150	44439130	0.93	5.9e-245	-5.56508	2.62e-08
Oligodendrocytes	Oli.5	ARL17B	17	44352150	44439130	0.86	1e-181	-5.56254	2.66e-08
Excitatory_Neurons	cux2-_Exc.16	LRRC37A2	17	44588877	44633016	0.61	6.5e-86	-5.5623	2.66e-08
Inhibitory_Neurons	Inh.4	ARL17B	17	44352150	44439130	0.86	8.6e-178	-5.5599	2.7e-08
Inhibitory_Neurons	Inh.8	ARL17B	17	44352150	44439130	0.92	7e-233	-5.55547	2.77e-08
Astrocyte	Ast.1	MAPT	17	43971748	44105700	0.2	1.2e-21	-5.5553	2.77e-08
Excitatory_Neurons	cux2-_Exc.13	LRRC37A	17	44370099	44415160	0.4	1.2e-48	-5.5485	2.88e-08
Oligodendrocytes	Oli.2	ARL17B	17	44352150	44439130	0.91	2.6e-221	-5.54761	2.9e-08
Excitatory_Neurons	cux2-_Exc.16	TAF6	7	99704693	99717464	0.07	3.8e-08	5.54541	2.93e-08
Inhibitory_Neurons	Inh.3	ARL17B	17	44352150	44439130	0.89	3.9e-207	-5.54508	2.94e-08
Excitatory_Neurons	cux2-_Exc.14	ARL17B	17	44352150	44439130	0.95	7.7e-265	-5.5405	3.02e-08
Excitatory_Neurons	cux2-_Exc.13	ARL17B	17	44352150	44439130	0.94	2.1e-253	-5.5395	3.03e-08
Microglia	Mic.13	ARL17B	17	44352150	44439130	0.51	1.4e-52	-5.53663	3.08e-08
Microglia	Mic.2	RASGEF1C	5	179527795	179636153	0.6	1.7e-72	-5.53244	3.16e-08
OPCs	OPC.1	ARL17B	17	44352150	44439130	0.7	8.9e-112	-5.5316	3.17e-08
Excitatory_Neurons	cux2-_Exc.15	ARL17B	17	44352150	44439130	0.93	2.8e-240	-5.52547	3.29e-08
Excitatory_Neurons	cux2-_Exc.9	SCIMP	17	5112256	5138155	0.07	2e-08	5.52508	3.29e-08
Microglia	Mic.12	ARL17B	17	44352150	44439130	0.74	2.4e-118	-5.51386	3.51e-08
Inhibitory_Neurons	Inh.5	ARL17B	17	44352150	44439130	0.82	8.3e-156	-5.5138	3.51e-08
Astrocyte	Ast.1	HLA-DRB1	6	32546546	32557625	0.081	2.2e-09	5.513	3.53e-08
Oligodendrocytes	Oli.3	MAPT-AS1	17	43921017	43972966	0.061	1.4e-07	5.51233	3.54e-08
Oligodendrocytes	Oli.1	ARL17B	17	44352150	44439130	0.74	1.4e-124	-5.5122	3.54e-08
Inhibitory_Neurons	Inh.7	ARL17B	17	44352150	44439130	0.88	1.5e-193	-5.51215	3.54e-08
Microglia	Mic.5	ARL17B	17	44352150	44439130	0.85	4.3e-174	-5.51014	3.59e-08
Oligodendrocytes	Oli.6	ARL17B	17	44352150	44439130	0.92	4.4e-233	-5.50467	3.7e-08
Inhibitory_Neurons	Inh.12	ARL17B	17	44352150	44439130	0.89	4.8e-200	-5.49877	3.82e-08
Microglia	Mic.2	ARL17B	17	44352150	44439130	0.84	9.4e-144	-5.48718	4.08e-08
Oligodendrocytes	Oli.6	KANSL1-AS1	17	44270942	44274089	0.19	4.9e-21	-5.48373	4.16e-08
Excitatory_Neurons	cux2+_Exc.5	LRRC37A	17	44370099	44415160	0.71	3.9e-114	-5.48357	4.17e-08
Excitatory_Neurons	cux2-_Exc.11	LRRC37A	17	44370099	44415160	0.52	6.8e-69	-5.46265	4.69e-08
Astrocyte	Ast.4	SNX31	8	101585116	101675643	0.63	3e-94	5.4604	4.75e-08
Excitatory_Neurons	cux2+_Exc.2	KANSL1-AS1	17	44270942	44274089	0.35	1.2e-41	-5.4558	4.87e-08
Excitatory_Neurons	cux2-_Exc.16	ARL17B	17	44352150	44439130	0.93	5.8e-230	-5.4529	4.96e-08
Excitatory_Neurons	cux2+_Exc.1	LRRC37A2	17	44588877	44633016	0.45	1.1e-32	-5.44987	5.04e-08
OPCs	OPC.1	LRRC37A2	17	44588877	44633016	0.26	1.2e-29	-5.4469	5.12e-08
Astrocyte	Ast.5	ARL17B	17	44352150	44439130	0.9	5.6e-202	-5.44356	5.22e-08
Excitatory_Neurons	cux2+_Exc.3	ARL17B	17	44352150	44439130	0.9	1.3e-206	-5.43882	5.36e-08
Inhibitory_Neurons	Inh.10	ARL17B	17	44352150	44439130	0.94	1.9e-258	-5.43779	5.39e-08
Excitatory_Neurons	cux2-_Exc.8	CRHR1	17	43699267	43913194	0.052	1.3e-06	-5.42953	5.65e-08
Excitatory_Neurons	cux2-_Exc.12	ARL17B	17	44352150	44439130	0.95	4.4e-276	-5.42945	5.65e-08
Excitatory_Neurons	cux2-_Exc.10	ARL17B	17	44352150	44439130	0.91	3.9e-219	-5.4267	5.74e-08
Excitatory_Neurons	cux2+_Exc.4	ARL17B	17	44352150	44439130	0.97	0	-5.42628	5.75e-08
Excitatory_Neurons	cux2-_Exc.9	CD55	1	207494853	207534311	0.058	2.8e-07	-5.42306	5.86e-08
Excitatory_Neurons	cux2+_Exc.7	ARL17B	17	44352150	44439130	0.96	1.2e-300	-5.42232	5.88e-08
Inhibitory_Neurons	Inh.15	ARL17B	17	44352150	44439130	0.94	1.4e-266	-5.42099	5.93e-08
OPCs	OPC.3	ARL17B	17	44352150	44439130	0.93	1e-171	-5.41389	6.17e-08
Oligodendrocytes	Oli.9	ARL17B	17	44352150	44439130	0.66	4.2e-97	-5.40624	6.44e-08
Astrocyte	Ast.1	ARL17B	17	44352150	44439130	0.95	5.7e-281	-5.4003	6.65e-08
Excitatory_Neurons	cux2+_Exc.5	ARL17B	17	44352150	44439130	0.97	0	-5.39781	6.75e-08
Excitatory_Neurons	cux2+_Exc.2	ARL17B	17	44352150	44439130	0.96	2.4e-304	-5.3939	6.89e-08
Excitatory_Neurons	cux2-_Exc.11	ARL17B	17	44352150	44439130	0.94	1.6e-261	-5.39296	6.93e-08
Excitatory_Neurons	cux2+_Exc.6	ARL17B	17	44352150	44439130	0.96	2.2e-304	-5.39229	6.96e-08
Excitatory_Neurons	cux2+_Exc.5	KANSL1-AS1	17	44270942	44274089	0.2	4.4e-22	-5.39206	6.97e-08
Astrocyte	Ast.4	ARL17B	17	44352150	44439130	0.95	6.5e-271	-5.391	7.01e-08
Astrocyte	Ast.6	ARL17B	17	44352150	44439130	0.71	2.3e-83	-5.3887	7.1e-08
Excitatory_Neurons	cux2-_Exc.9	ARL17B	17	44352150	44439130	0.96	1.6e-298	-5.38788	7.13e-08
Excitatory_Neurons	cux2-_Exc.10	CRHR1	17	43699267	43913194	0.16	2.5e-18	-5.37163	7.8e-08
Oligodendrocytes	Oli.3	ARL17B	17	44352150	44439130	0.96	2.2e-295	-5.37018	7.87e-08
Inhibitory_Neurons	Inh.16	ARL17B	17	44352150	44439130	0.95	1.2e-270	-5.36687	8.01e-08
Inhibitory_Neurons	Inh.13	ARL17B	17	44352150	44439130	0.88	1.4e-190	-5.36388	8.15e-08
Microglia	Mic.4	JAZF1	7	27870192	28220362	0.36	2.5e-39	-5.35893	8.37e-08
Excitatory_Neurons	cux2+_Exc.7	LRRC37A	17	44370099	44415160	0.49	1.7e-64	-5.33351	9.63e-08
Excitatory_Neurons	cux2-_Exc.8	KANSL1-AS1	17	44270942	44274089	0.32	3.7e-37	-5.32368	1.02e-07
Microglia	Mic.2	JAZF1	7	27870192	28220362	0.5	3.3e-55	-5.3234	1.02e-07
Oligodendrocytes	Oli.6	MAPT-AS1	17	43921017	43972966	0.089	2.2e-10	5.32149	1.03e-07
Inhibitory_Neurons	Inh.11	ARL17B	17	44352150	44439130	0.87	5.3e-188	-5.32048	1.03e-07
Microglia	Mic.3	JAZF1	7	27870192	28220362	0.37	8e-40	-5.31822	1.05e-07
Excitatory_Neurons	cux2-_Exc.10	KANSL1-AS1	17	44270942	44274089	0.32	1e-37	-5.30254	1.14e-07
Oligodendrocytes	Oli.2	MAPT-AS1	17	43921017	43972966	0.092	1e-10	5.30172	1.15e-07
Astrocyte	Ast.3	ARL17B	17	44352150	44439130	0.92	3.4e-230	-5.29267	1.21e-07
Excitatory_Neurons	cux2+_Exc.4	ZKSCAN1	7	99613204	99639312	0.12	1.1e-13	-5.2917	1.21e-07
Inhibitory_Neurons	Inh.15	KANSL1-AS1	17	44270942	44274089	0.18	1e-20	-5.28588	1.25e-07
Excitatory_Neurons	cux2-_Exc.8	ARL17B	17	44352150	44439130	0.96	1e-298	-5.27027	1.36e-07
Astrocyte	Ast.10	ARL17B	17	44352150	44439130	0.82	2.1e-64	-5.26043	1.44e-07
Excitatory_Neurons	cux2+_Exc.3	POLR2E	19	1086594	1095598	0.14	7.7e-16	5.25987	1.44e-07
Excitatory_Neurons	cux2+_Exc.3	TAP2	6	32789610	32806557	0.23	3.6e-25	-5.2559	1.47e-07
Excitatory_Neurons	cux2+_Exc.3	CRHR1	17	43699267	43913194	0.11	1.2e-12	-5.25145	1.51e-07
Excitatory_Neurons	cux2-_Exc.15	LRRC37A	17	44370099	44415160	0.52	3.6e-69	-5.24249	1.58e-07
Excitatory_Neurons	cux2+_Exc.6	KANSL1-AS1	17	44270942	44274089	0.36	1.2e-42	-5.24231	1.59e-07
Excitatory_Neurons	cux2+_Exc.7	CRHR1	17	43699267	43913194	0.056	5e-07	-5.24077	1.6e-07
Excitatory_Neurons	cux2-_Exc.11	TAP2	6	32789610	32806557	0.052	1.4e-06	-5.2278	1.72e-07
Inhibitory_Neurons	Inh.6	ARL17B	17	44352150	44439130	0.95	5.5e-283	-5.22031	1.79e-07
Microglia	Mic.8	JAZF1	7	27870192	28220362	0.27	8.6e-28	-5.2195	1.79e-07
Excitatory_Neurons	cux2+_Exc.2	CRHR1	17	43699267	43913194	0.11	6e-12	-5.2133	1.85e-07
Excitatory_Neurons	cux2-_Exc.10	LRRC37A	17	44370099	44415160	0.53	3.8e-70	-5.21108	1.88e-07
Excitatory_Neurons	cux2+_Exc.3	LRRC37A	17	44370099	44415160	0.72	1e-116	-5.20369	1.95e-07
OPCs	OPC.2	LRRC37A2	17	44588877	44633016	0.4	2.5e-48	-5.19044	2.1e-07
Oligodendrocytes	Oli.3	ADAM10	15	58887403	59042177	0.068	2.9e-08	5.17465	2.28e-07
Excitatory_Neurons	cux2+_Exc.5	CRHR1	17	43699267	43913194	0.077	4.2e-09	-5.17434	2.29e-07
Excitatory_Neurons	cux2+_Exc.4	CYYR1	21	27838528	27945603	0.095	6.5e-11	5.17198	2.32e-07
Excitatory_Neurons	cux2+_Exc.5	TAP2	6	32789610	32806557	0.36	1.5e-42	-5.156	2.52e-07
Microglia	Mic.2	USP6NL	10	11495945	11653753	0.062	1.3e-06	5.1535	2.56e-07
Astrocyte	Ast.4	LRRC37A	17	44370099	44415160	0.22	5.1e-25	-5.1416	2.72e-07
Astrocyte	Ast.3	MAPT	17	43971748	44105700	0.12	6.3e-14	-5.12386	2.99e-07
Astrocyte	Ast.9	ARL17B	17	44352150	44439130	0.85	1.5e-33	-5.1082	3.25e-07
Excitatory_Neurons	cux2-_Exc.11	CRHR1	17	43699267	43913194	0.051	1.7e-06	-5.0999	3.4e-07
Excitatory_Neurons	cux2+_Exc.3	ICA1L	2	203640690	203736708	0.054	9.7e-07	5.0815	3.74e-07
Oligodendrocytes	Oli.3	KANSL1-AS1	17	44270942	44274089	0.41	4.2e-50	-5.07229	3.93e-07
Excitatory_Neurons	cux2+_Exc.2	ZKSCAN1	7	99613204	99639312	0.11	1e-12	-5.05884	4.22e-07
Excitatory_Neurons	cux2-_Exc.9	CRHR1	17	43699267	43913194	0.21	2e-23	-5.0536	4.34e-07
Excitatory_Neurons	cux2+_Exc.3	PRSS36	16	31150246	31161415	0.074	8.7e-09	-5.04395	4.56e-07
Excitatory_Neurons	cux2+_Exc.2	ICA1L	2	203640690	203736708	0.084	8.8e-10	5.04277	4.59e-07
Astrocyte	Ast.4	HLA-DRA	6	32407619	32412823	0.3	6.7e-35	5.03	4.9e-07
Oligodendrocytes	Oli.2	KANSL1-AS1	17	44270942	44274089	0.37	4.5e-44	-5.007	5.53e-07
Microglia	Mic.2	FERMT2	14	53323986	53419153	0.069	3.1e-07	4.9955	5.87e-07
Oligodendrocytes	Oli.2	KCTD13	16	29916333	29938356	0.1	1.3e-11	-4.9801	6.35e-07
Excitatory_Neurons	cux2+_Exc.4	CRHR1	17	43699267	43913194	0.074	8.8e-09	-4.97696	6.46e-07
Excitatory_Neurons	cux2+_Exc.5	ZKSCAN1	7	99613204	99639312	0.1	1.1e-11	-4.96451	6.89e-07
Oligodendrocytes	Oli.11	KANSL1	17	44107282	44302733	0.17	5.8e-14	-4.9169	8.79e-07
Astrocyte	Ast.3	ANXA11	10	81910645	81965328	0.11	7.7e-13	4.8856	1.03e-06
Excitatory_Neurons	cux2+_Exc.2	ARL4A	7	12726481	12730559	0.065	6.3e-08	-4.87161	1.11e-06
Oligodendrocytes	Oli.5	SLC4A8	12	51785101	51902980	0.16	3.2e-18	-4.84074	1.29e-06
Excitatory_Neurons	cux2-_Exc.8	ARHGAP27	17	43471275	43511787	0.16	3.7e-18	-4.83907	1.3e-06
Microglia	Mic.9	RASGEF1C	5	179527795	179636153	0.17	1.6e-15	-4.80898	1.52e-06
Inhibitory_Neurons	Inh.1	KANSL1	17	44107282	44302733	0.13	1.6e-11	-4.8051	1.55e-06
Excitatory_Neurons	cux2+_Exc.6	TAP2	6	32789610	32806557	0.11	2.5e-12	-4.7961	1.62e-06
Excitatory_Neurons	cux2-_Exc.8	TAP2	6	32789610	32806557	0.15	2.4e-16	-4.78	1.76e-06
Excitatory_Neurons	cux2+_Exc.6	ARHGAP27	17	43471275	43511787	0.22	7e-25	-4.77721	1.78e-06
Astrocyte	Ast.1	KANSL1-AS1	17	44270942	44274089	0.46	3.6e-57	-4.7659	1.88e-06
Excitatory_Neurons	cux2+_Exc.4	KANSL1-AS1	17	44270942	44274089	0.32	1e-36	-4.76431	1.9e-06
Excitatory_Neurons	cux2+_Exc.2	MTUS1	8	17501304	17658426	0.1	2.1e-11	-4.7597	1.94e-06
Excitatory_Neurons	cux2+_Exc.3	HLA-DOB	6	32780540	32784825	0.43	2.8e-53	-4.7528	2.01e-06
Excitatory_Neurons	cux2+_Exc.4	HLA-DOB	6	32780540	32784825	0.44	9.8e-55	-4.7503	2.03e-06
Astrocyte	Ast.3	KANSL1-AS1	17	44270942	44274089	0.2	7.3e-23	-4.72666	2.28e-06
Excitatory_Neurons	cux2+_Exc.4	RSPH10B	7	5965181	6010314	0.074	9.4e-09	4.7129	2.44e-06
Astrocyte	Ast.1	LRRC37A	17	44370099	44415160	0.4	1.1e-47	-4.7091	2.49e-06
Excitatory_Neurons	cux2+_Exc.3	KANSL1-AS1	17	44270942	44274089	0.54	9.5e-73	-4.70731	2.51e-06
Oligodendrocytes	Oli.3	USP6NL	10	11495945	11653753	0.19	5.2e-21	-4.70379	2.55e-06
Excitatory_Neurons	cux2-_Exc.12	TAP2	6	32789610	32806557	0.072	1.9e-08	-4.7011	2.59e-06
Microglia	Mic.2	SCIMP	17	5112256	5138155	0.061	1.5e-06	4.6892	2.74e-06
Excitatory_Neurons	cux2+_Exc.4	MTUS1	8	17501304	17658426	0.071	1.6e-08	-4.68737	2.77e-06
Oligodendrocytes	Oli.7	KANSL1	17	44107282	44302733	0.2	9.8e-15	-4.65514	3.24e-06
Microglia	Mic.7	APOC1	19	45417504	45422606	0.087	9.5e-09	4.6546	3.25e-06
Microglia	Mic.3	HLA-DRB1	6	32546546	32557625	0.068	1.9e-07	4.6386	3.51e-06
Excitatory_Neurons	cux2-_Exc.16	LRRC37A	17	44370099	44415160	0.28	5.5e-31	-4.63	3.66e-06
Inhibitory_Neurons	Inh.3	IL10RB	21	34638663	34669539	0.057	4e-07	4.6262	3.73e-06
Oligodendrocytes	Oli.4	KANSL1	17	44107282	44302733	0.31	1.1e-34	-4.6224	3.79e-06
Astrocyte	Ast.3	LRRC37A	17	44370099	44415160	0.22	6.3e-25	-4.61774	3.88e-06
Inhibitory_Neurons	Inh.2	TAP2	6	32789610	32806557	0.11	5.7e-13	-4.6161	3.91e-06
Microglia	Mic.10	KANSL1	17	44107282	44302733	0.12	5.2e-10	-4.60195	4.19e-06
OPCs	MFOL	KANSL1	17	44107282	44302733	0.19	5e-20	-4.6006	4.21e-06
Excitatory_Neurons	cux2-_Exc.15	KANSL1	17	44107282	44302733	0.69	2.2e-106	-4.60001	4.22e-06
Excitatory_Neurons	cux2+_Exc.1	LRRC37A	17	44370099	44415160	0.26	1.3e-17	-4.59768	4.27e-06
Inhibitory_Neurons	Inh.3	ZSCAN31	6	28292470	28324048	0.34	2.4e-40	4.593	4.37e-06
Oligodendrocytes	Oli.5	KANSL1	17	44107282	44302733	0.5	2.1e-65	-4.59127	4.41e-06
Inhibitory_Neurons	Inh.12	CCNT2-AS1	2	135493034	135676280	0.088	3.6e-10	4.58308	4.58e-06
Inhibitory_Neurons	Inh.5	KANSL1	17	44107282	44302733	0.52	5.3e-68	-4.5772	4.71e-06
Astrocyte	Ast.1	STAG3	7	99775186	99819111	0.079	3e-09	-4.5735	4.8e-06
Excitatory_Neurons	cux2+_Exc.7	ICA1L	2	203640690	203736708	0.13	4.5e-15	4.57276	4.81e-06
OPCs	OPC.2	KANSL1	17	44107282	44302733	0.84	2e-168	-4.5663	4.96e-06
Microglia	Mic.9	HLA-DRB1	6	32546546	32557625	0.066	7.4e-07	4.5564	5.2e-06
Excitatory_Neurons	cux2-_Exc.12	PLEKHA1	10	124134212	124191867	0.083	1.7e-09	4.55154	5.33e-06
Astrocyte	Ast.1	SNX31	8	101585116	101675643	0.25	1e-27	4.5443	5.51e-06
OPCs	OPC.1	KANSL1	17	44107282	44302733	0.57	1.7e-80	-4.5442	5.51e-06
Oligodendrocytes	Oli.3	CCNT2-AS1	2	135493034	135676280	0.073	9.6e-09	-4.5427	5.55e-06
Microglia	Mic.1	KANSL1	17	44107282	44302733	0.12	8.5e-07	-4.5223	6.12e-06
Inhibitory_Neurons	Inh.10	MTCH2	11	47638867	47664175	0.064	8.2e-08	4.51083	6.46e-06
Oligodendrocytes	Oli.3	SLC4A8	12	51785101	51902980	0.25	2.2e-28	-4.50725	6.57e-06
Inhibitory_Neurons	Inh.4	KANSL1	17	44107282	44302733	0.42	1.9e-50	-4.5067	6.58e-06
Excitatory_Neurons	cux2+_Exc.5	LLGL1	17	18128901	18148189	0.25	9.9e-28	-4.49096	7.09e-06
Inhibitory_Neurons	Inh.6	KANSL1	17	44107282	44302733	0.71	2.1e-115	-4.49027	7.11e-06
Excitatory_Neurons	cux2+_Exc.2	TAP2	6	32789610	32806557	0.31	3.7e-35	-4.4898	7.13e-06
Inhibitory_Neurons	Inh.3	KANSL1	17	44107282	44302733	0.64	3.8e-94	-4.47114	7.78e-06
Inhibitory_Neurons	Inh.2	KANSL1	17	44107282	44302733	0.66	8.1e-101	-4.46252	8.1e-06
Excitatory_Neurons	cux2+_Exc.3	SYT14	1	210111538	210337636	0.12	6.5e-14	-4.4597	8.21e-06
Astrocyte	Ast.4	LLGL1	17	18128901	18148189	0.083	8.4e-10	-4.4514	8.53e-06
Excitatory_Neurons	cux2-_Exc.16	KANSL1	17	44107282	44302733	0.54	4.8e-70	-4.4502	8.58e-06
Excitatory_Neurons	cux2-_Exc.14	ZKSCAN1	7	99613204	99639312	0.047	5.3e-06	-4.4491	8.62e-06
Oligodendrocytes	Oli.6	SLC4A8	12	51785101	51902980	0.22	1e-24	-4.44	9e-06
Oligodendrocytes	Oli.6	GALNT6	12	51745031	51786651	0.28	1.9e-32	-4.44	9e-06
Oligodendrocytes	Oli.9	KANSL1	17	44107282	44302733	0.42	3.6e-50	-4.42839	9.49e-06
Inhibitory_Neurons	Inh.8	KANSL1	17	44107282	44302733	0.65	6.6e-96	-4.41981	9.88e-06
Excitatory_Neurons	cux2+_Exc.3	MTUS1	8	17501304	17658426	0.14	1e-15	-4.41445	1.01e-05
Excitatory_Neurons	cux2+_Exc.6	MTUS1	8	17501304	17658426	0.18	9e-20	-4.41234	1.02e-05
Astrocyte	Ast.10	LRRC37A2	17	44588877	44633016	0.36	1.1e-17	-4.3985	1.09e-05
Astrocyte	Ast.3	KANSL1	17	44107282	44302733	0.7	3.8e-112	-4.39129	1.13e-05
Excitatory_Neurons	cux2-_Exc.16	TAP2	6	32789610	32806557	0.067	7.6e-08	-4.388	1.15e-05
Excitatory_Neurons	cux2+_Exc.2	HLA-DOB	6	32780540	32784825	0.42	4.5e-52	-4.3818	1.18e-05
Oligodendrocytes	Oli.5	GALNT6	12	51745031	51786651	0.054	9.1e-07	-4.37899	1.19e-05
Microglia	Mic.12	JAZF1	7	27870192	28220362	0.11	1.4e-11	-4.37704	1.2e-05
Astrocyte	Ast.4	KANSL1	17	44107282	44302733	0.77	4.4e-136	-4.3762	1.21e-05
Oligodendrocytes	Oli.9	SLC4A8	12	51785101	51902980	0.065	1.2e-07	-4.3713	1.23e-05
Excitatory_Neurons	cux2+_Exc.5	ZKSCAN3	6	28317691	28336947	0.051	1.7e-06	-4.3701	1.24e-05
Astrocyte	Ast.5	LRRC37A2	17	44588877	44633016	0.18	3.1e-19	-4.36189	1.29e-05
Inhibitory_Neurons	Inh.10	ZSCAN31	6	28292470	28324048	0.71	5.3e-115	4.3611	1.29e-05
Inhibitory_Neurons	Inh.7	KANSL1	17	44107282	44302733	0.64	4.1e-95	-4.35672	1.32e-05
Oligodendrocytes	Oli.12	KANSL1	17	44107282	44302733	0.19	2.1e-17	-4.35232	1.35e-05
Inhibitory_Neurons	Inh.9	CCNT2-AS1	2	135493034	135676280	0.13	8.7e-15	-4.3508	1.36e-05
Oligodendrocytes	Oli.3	GALNT6	12	51745031	51786651	0.23	2.8e-26	-4.35068	1.36e-05
OPCs	OPC.3	KANSL1	17	44107282	44302733	0.33	1.2e-27	-4.34333	1.4e-05
Oligodendrocytes	Oli.3	KANSL1	17	44107282	44302733	0.73	3.5e-124	-4.34141	1.42e-05
Inhibitory_Neurons	Inh.8	CCNT2-AS1	2	135493034	135676280	0.053	1.1e-06	-4.33907	1.43e-05
Inhibitory_Neurons	Inh.10	LLGL1	17	18128901	18148189	0.13	2.3e-14	-4.33876	1.43e-05
Excitatory_Neurons	cux2+_Exc.6	KANSL1	17	44107282	44302733	0.66	1.8e-102	-4.33691	1.44e-05
Astrocyte	Ast.3	HLA-A	6	29909037	29913661	0.16	1.9e-18	4.3305	1.49e-05
Excitatory_Neurons	cux2+_Exc.4	KANSL1	17	44107282	44302733	0.78	3.8e-140	-4.32729	1.51e-05
Inhibitory_Neurons	Inh.10	KANSL1	17	44107282	44302733	0.76	6.7e-134	-4.32355	1.54e-05
Excitatory_Neurons	cux2-_Exc.8	ZKSCAN1	7	99613204	99639312	0.062	1.3e-07	-4.3234	1.54e-05
Inhibitory_Neurons	Inh.11	KANSL1	17	44107282	44302733	0.62	8.7e-91	-4.31878	1.57e-05
Astrocyte	Ast.5	KANSL1	17	44107282	44302733	0.39	4e-44	-4.31529	1.59e-05
Excitatory_Neurons	cux2+_Exc.6	CRHR1	17	43699267	43913194	0.11	8.3e-13	-4.31332	1.61e-05
Excitatory_Neurons	cux2-_Exc.10	KANSL1	17	44107282	44302733	0.68	2.7e-106	-4.31285	1.61e-05
Inhibitory_Neurons	Inh.16	CCNT2-AS1	2	135493034	135676280	0.11	9.1e-13	4.31094	1.63e-05
Excitatory_Neurons	cux2+_Exc.7	KANSL1	17	44107282	44302733	0.74	8.2e-124	-4.30927	1.64e-05
Excitatory_Neurons	cux2-_Exc.11	KANSL1	17	44107282	44302733	0.68	6.9e-108	-4.30648	1.66e-05
Excitatory_Neurons	cux2+_Exc.2	KANSL1	17	44107282	44302733	0.79	2.6e-142	-4.3044	1.67e-05
Astrocyte	Ast.1	LLGL1	17	18128901	18148189	0.39	5.7e-46	-4.2987	1.72e-05
Excitatory_Neurons	cux2-_Exc.9	HLA-DMA	6	32916390	32936871	0.81	7.6e-155	-4.29106	1.78e-05
Oligodendrocytes	Oli.12	BACH2	6	90636248	91006627	0.11	9.9e-11	-4.2889	1.8e-05
Excitatory_Neurons	cux2-_Exc.13	KANSL1	17	44107282	44302733	0.62	1.5e-89	-4.2858	1.82e-05
Excitatory_Neurons	cux2+_Exc.5	KANSL1	17	44107282	44302733	0.8	6.9e-147	-4.28527	1.83e-05
Oligodendrocytes	Oli.6	KANSL1	17	44107282	44302733	0.63	1.2e-93	-4.28467	1.83e-05
Excitatory_Neurons	cux2+_Exc.5	SYT14	1	210111538	210337636	0.13	9.1e-15	-4.27232	1.93e-05
Microglia	Mic.7	JAZF1	7	27870192	28220362	0.34	2.4e-33	-4.26734	1.98e-05
Oligodendrocytes	Oli.1	SLC4A8	12	51785101	51902980	0.046	5.4e-06	-4.2662	1.99e-05
Inhibitory_Neurons	Inh.15	KANSL1	17	44107282	44302733	0.79	7e-145	-4.2615	2.03e-05
Oligodendrocytes	Oli.3	ACMSD	2	135596117	135659604	0.065	5.8e-08	-4.25711	2.07e-05
Excitatory_Neurons	cux2-_Exc.13	MTUS1	8	17501304	17658426	0.049	3.3e-06	-4.2452	2.18e-05
Excitatory_Neurons	cux2+_Exc.4	TAP2	6	32789610	32806557	0.34	8.2e-40	-4.2433	2.2e-05
Excitatory_Neurons	cux2-_Exc.9	HLA-DOB	6	32780540	32784825	0.49	1.4e-63	-4.23951	2.24e-05
Oligodendrocytes	Oli.2	SLC4A8	12	51785101	51902980	0.18	3e-20	-4.23139	2.32e-05
Astrocyte	Ast.2	MAPT	17	43971748	44105700	0.38	3.9e-31	-4.22644	2.37e-05
Inhibitory_Neurons	Inh.13	KANSL1	17	44107282	44302733	0.62	8.1e-89	-4.22208	2.42e-05
Microglia	Mic.8	RASGEF1C	5	179527795	179636153	0.18	1.1e-17	-4.2151	2.5e-05
Microglia	Mic.9	JAZF1	7	27870192	28220362	0.15	5.9e-14	-4.20946	2.56e-05
Excitatory_Neurons	cux2-_Exc.8	LLGL1	17	18128901	18148189	0.24	9.5e-27	-4.20873	2.57e-05
Inhibitory_Neurons	Inh.6	MTCH2	11	47638867	47664175	0.057	3.4e-07	4.20485	2.61e-05
Excitatory_Neurons	cux2+_Exc.2	SYT14	1	210111538	210337636	0.14	3.1e-15	-4.18973	2.79e-05
Excitatory_Neurons	cux2+_Exc.6	LLGL1	17	18128901	18148189	0.29	8.2e-34	-4.1836	2.87e-05
Microglia	Mic.9	HLA-DQB1	6	32627244	32636160	0.23	3.2e-21	4.1821	2.89e-05
Astrocyte	Ast.1	LACTB	15	63413999	63434260	0.066	6.4e-08	4.1785	2.93e-05
Excitatory_Neurons	cux2+_Exc.4	ZNF221	19	44455375	44471861	0.057	4.7e-07	-4.14375	3.42e-05
Excitatory_Neurons	cux2+_Exc.4	CCNT2-AS1	2	135493034	135676280	0.14	2e-15	-4.1376	3.51e-05
Excitatory_Neurons	cux2-_Exc.14	KNOP1	16	19714902	19729557	0.092	1.7e-10	-4.1308	3.61e-05
Microglia	Mic.1	JAZF1	7	27870192	28220362	0.26	8.7e-14	-4.12539	3.7e-05
Astrocyte	Ast.1	TAP2	6	32789610	32806557	0.12	1.1e-13	-4.1239	3.73e-05
Excitatory_Neurons	cux2-_Exc.12	KNOP1	16	19714902	19729557	0.11	1.1e-12	-4.12005	3.79e-05
Oligodendrocytes	Oli.9	KNOP1	16	19714902	19729557	0.25	1.4e-26	-4.10824	3.99e-05
Astrocyte	Ast.1	MAPT-AS1	17	43921017	43972966	0.058	4.1e-07	-4.0987	4.15e-05
Inhibitory_Neurons	Inh.15	USF1	1	161009041	161015767	0.19	6.3e-21	4.09804	4.17e-05
Oligodendrocytes	Oli.4	KNOP1	16	19714902	19729557	0.21	9.3e-23	-4.09	4.34e-05
Astrocyte	Ast.1	KNOP1	16	19714902	19729557	0.61	7.6e-86	-4.08501	4.41e-05
Inhibitory_Neurons	Inh.16	KANSL1	17	44107282	44302733	0.77	4.3e-138	-4.08163	4.47e-05
Excitatory_Neurons	cux2-_Exc.15	CCNT2-AS1	2	135493034	135676280	0.049	2.7e-06	-4.07135	4.67e-05
Inhibitory_Neurons	Inh.3	KNOP1	16	19714902	19729557	0.1	1.1e-11	-4.0589	4.93e-05
Inhibitory_Neurons	Inh.12	KANSL1	17	44107282	44302733	0.61	1.4e-88	-4.05711	4.97e-05
Excitatory_Neurons	cux2-_Exc.8	KANSL1	17	44107282	44302733	0.72	1.8e-117	-4.05569	5e-05
Excitatory_Neurons	cux2-_Exc.8	KNOP1	16	19714902	19729557	0.083	9.3e-10	-4.04929	5.14e-05
Excitatory_Neurons	cux2-_Exc.10	TIPIN	15	66628544	66679084	0.085	5.9e-10	-4.04112	5.32e-05
Excitatory_Neurons	cux2-_Exc.12	KANSL1	17	44107282	44302733	0.7	2.8e-110	-4.03576	5.44e-05
Excitatory_Neurons	cux2-_Exc.10	TAP2	6	32789610	32806557	0.091	1.4e-10	-4.0349	5.46e-05
Microglia	Mic.1	DLEU1	13	50656307	51297372	0.15	3.8e-08	4.03	5.65e-05
Astrocyte	Ast.6	KANSL1	17	44107282	44302733	0.31	4.2e-26	-4.0248	5.7e-05
Excitatory_Neurons	cux2-_Exc.15	LYSMD4	15	100255902	100273766	0.052	1.5e-06	4.02235	5.76e-05
Oligodendrocytes	Oli.1	KANSL1	17	44107282	44302733	0.39	3.5e-47	-4.0216	5.78e-05
Astrocyte	Ast.3	KNOP1	16	19714902	19729557	0.58	1e-82	-4.01797	5.87e-05
Oligodendrocytes	Oli.2	GALNT6	12	51745031	51786651	0.27	1.5e-30	-4.01599	5.92e-05
Astrocyte	Ast.2	NSF	17	44668035	44834830	0.22	1.9e-17	4.01364	5.98e-05
Microglia	Mic.4	NUP160	11	47799639	47870107	0.097	3.3e-10	4.00603	6.17e-05
Astrocyte	Ast.4	KNOP1	16	19714902	19729557	0.56	4.2e-77	-4.00404	6.23e-05
Inhibitory_Neurons	Inh.5	PLEKHA1	10	124134212	124191867	0.06	2.5e-07	4.00053	6.32e-05
Microglia	Mic.3	KANSL1	17	44107282	44302733	0.25	1.7e-25	-3.99921	6.36e-05
Excitatory_Neurons	cux2-_Exc.11	SYT14	1	210111538	210337636	0.13	8.8e-15	-3.99276	6.53e-05
Oligodendrocytes	Oli.2	KANSL1	17	44107282	44302733	0.72	3.7e-118	-3.98718	6.69e-05
Astrocyte	Ast.3	LRRC37A2	17	44588877	44633016	0.57	3.1e-80	-3.96452	7.35e-05
Oligodendrocytes	Oli.5	KNOP1	16	19714902	19729557	0.3	1e-33	-3.95889	7.53e-05
Microglia	Mic.6	KANSL1	17	44107282	44302733	0.19	3.2e-17	-3.95638	7.61e-05
Inhibitory_Neurons	Inh.10	TAP2	6	32789610	32806557	0.058	2.9e-07	-3.9488	7.85e-05
Inhibitory_Neurons	Inh.8	TMEM163	2	135213330	135476570	0.052	1.5e-06	-3.93791	8.22e-05
Excitatory_Neurons	cux2-_Exc.15	KNOP1	16	19714902	19729557	0.19	1.7e-21	-3.93744	8.24e-05
Astrocyte	Ast.5	KNOP1	16	19714902	19729557	0.44	1.1e-52	-3.9318	8.43e-05
Excitatory_Neurons	cux2-_Exc.11	KNOP1	16	19714902	19729557	0.058	3e-07	-3.91753	8.95e-05
Excitatory_Neurons	cux2-_Exc.13	GLG1	16	74485856	74641012	0.13	4e-14	-3.9126	9.13e-05
Oligodendrocytes	Oli.6	KNOP1	16	19714902	19729557	0.46	6.2e-58	-3.90832	9.29e-05
Inhibitory_Neurons	Inh.2	KNOP1	16	19714902	19729557	0.089	2.6e-10	-3.90103	9.58e-05
Astrocyte	Ast.2	LRRC37A2	17	44588877	44633016	0.15	1.2e-11	-3.89361	9.88e-05
Inhibitory_Neurons	Inh.8	ZSCAN31	6	28292470	28324048	0.2	1.5e-22	3.8844	0.000103
Oligodendrocytes	Oli.1	KNOP1	16	19714902	19729557	0.3	9.6e-35	-3.8767	0.000106
Astrocyte	Ast.5	ANXA11	10	81910645	81965328	0.1	2.2e-11	3.87	0.000109
Excitatory_Neurons	cux2-_Exc.14	KANSL1	17	44107282	44302733	0.64	3.8e-94	-3.8578	0.000114
Inhibitory_Neurons	Inh.11	ANXA11	10	81910645	81965328	0.082	1.1e-09	3.8572	0.000115
Oligodendrocytes	Oli.9	LRRFIP2	3	37094117	37225180	0.066	1.2e-07	3.84289	0.000122
Inhibitory_Neurons	Inh.2	ZSCAN31	6	28292470	28324048	0.37	3.7e-44	3.834	0.000126
Astrocyte	Ast.10	KANSL1	17	44107282	44302733	0.33	1.9e-16	-3.8203	0.000133
Microglia	Mic.5	HLA-DRB1	6	32546546	32557625	0.066	5.9e-08	3.8007	0.000144
Excitatory_Neurons	cux2+_Exc.1	KANSL1	17	44107282	44302733	0.23	1.9e-15	-3.79467	0.000148
Microglia	Mic.5	RIN3	14	92980118	93155339	0.15	1.1e-16	-3.68356	0.00023
Inhibitory_Neurons	Inh.11	PHACTR4	1	28696114	28826881	0.058	2.8e-07	3.66291	0.000249
OPCs	OPC.1	KNOP1	16	19714902	19729557	0.13	1.1e-14	-3.62624	0.000288
Astrocyte	Ast.7	BTAF1	10	93683526	93790082	0.32	2.8e-13	3.243	0.00118
Microglia	Mic.16	DLEU1	13	50656307	51297372	0.45	1.9e-26	2.984	0.00285
